Bamford et al. IFNL4

1    **A Polymorphic Residue That Attenuates Interferon Lambda 4 Activity in**  
2                                                           **Hominid Lineages**

3

4    Connor G. G. Bamford<sup>1</sup>, Elihu Aranday-Cortes<sup>1</sup>, Inès Cordeiro Filipe<sup>1</sup>, Swathi Sukumar<sup>1</sup>,  
5    Daniel Mair<sup>1</sup>, Ana da Silva Filipe<sup>1</sup>, Juan L. Mendoza<sup>2</sup>, K. Christopher Garcia<sup>2</sup>, Shaohua Fan<sup>3</sup>,  
6    Sarah A. Tishkoff<sup>3</sup>, John McLauchlan<sup>1,4</sup>

7

8    <sup>1</sup>MRC-University of Glasgow Centre for Virus Research, Glasgow G61 1QH, UK

9    <sup>2</sup>Howard Hughes Medical Institute, Department of Molecular and Cellular Physiology and  
10   Department of Structural Biology, Stanford University School of Medicine, Stanford, CA  
11   94305, USA

12   <sup>3</sup>Departments of Genetics and Biology, University of Pennsylvania, Philadelphia PA19104-  
13   6145, USA

14

15   <sup>4</sup>Corresponding Author/Lead Contact: John McLauchlan; [john.mclauchlan@glasgow.ac.uk](mailto:john.mclauchlan@glasgow.ac.uk)

16

17   Word Count: 2,500

18

Bamford et al. IFNL4

19 **SUMMARY**

20 Type III or lambda interferons (IFN $\lambda$ s) form a critical barrier to infection by diverse  
21 pathogens. However in humans, production of IFN $\lambda$ 4 is associated with decreased clearance  
22 of hepatitis C virus (HCV). How an antiviral cytokine came to promote infection and whether  
23 this phenomenon occurs in other species is unknown. Here we show that, compared to  
24 chimpanzee IFN $\lambda$ 4, the human orthologue has reduced activity due to a single amino acid  
25 substitution (E154K). IFN $\lambda$ 4s with E154 restrict virus infection more potently and induce  
26 more robust antiviral gene expression. Remarkably, E154 is the ancestral residue in  
27 mammalian IFN $\lambda$ 4s but altered in representatives of the *Homo* genus. Nonetheless, the more  
28 active E154 form of IFN $\lambda$ 4 can be found in African Congo rainforest ‘Pygmy’ hunter-  
29 gatherers. We postulate that evolution of an IFN $\lambda$ 4 with attenuated activity in humans has  
30 been exploited by pathogens such as HCV, which could explain distinct host-specific  
31 outcomes of infection.

32

33 **KEYWORDS**

34 Hepatitis C virus, interferon, evolution, interferon lambda 4, interferon-stimulated genes,  
35 antiviral activity.

36

37 **MAIN TEXT**

38 Vertebrates co-ordinate antiviral defences through the action of signalling proteins called  
39 interferons (IFNs). IFNs induce expression of hundreds of ‘interferon-stimulated genes’  
40 (ISGs), which establish a cell-intrinsic ‘antiviral state’ and regulate inflammation (Randall  
41 and Goodbourn 2008). Thus, IFNs are pleiotropic in activity and modulate aspects of  
42 protective immunity and pathogenesis (Schoggins 2014). Three groups of IFNs have been  
43 identified (types I – III), with the type III family – or IFN $\lambda$ s - being the most recently  
44 discovered (reviewed in Lazear et al. 2015b). Emerging evidence highlights the critical and  
45 non-redundant role IFN $\lambda$ s play in protecting against diverse pathogens, including viruses,  
46 bacteria, and fungi (Dixit et al. 2010, Nice et al. 2015, Lazear et al. 2015a, Galani et al. 2017,  
47 Odendall et al. 2017, Espinosa et al. 2017).

48

49 Although important in host defence, some IFNs are highly polymorphic (Manry et al. 2011).  
50 A single nucleotide insertion converting the ‘ $\Delta$ G’ allele to a ‘TT’ allele (rs368234815) yields  
51 a frameshift leading to loss of active human IFN $\lambda$ 4 (HsIFN $\lambda$ 4) (Prokunina-Olsson et al.  
52 2013). Although IFN $\lambda$ 4 is highly conserved among mammals, the TT allele has evolved  
53 under positive selection in some human populations (Key et al. 2014). Despite their broad  
54 antimicrobial functions, genome-wide association studies have convincingly demonstrated a  
55 correlation between  $\Delta$ G IFN $\lambda$ 4 and reduced spontaneous clearance of hepatitis C virus  
56 (HCV) infection, i.e individuals homozygous for TT clear HCV infection with greater  
57 frequency (Ge et al. 2009, Prokunina-Olsson et al. 2013). HsIFNL4 has also been linked to  
58 protection from liver inflammation (Eslam et al. 2015) and reduced HCV treatment response  
59 (Prokunina-Olsson et al. 2013). The mechanism underlying this contribution of HsIFN $\lambda$ 4 to  
60 viral persistence and pathogenesis is not well understood but is associated with differences in  
61 ISG induction (Terczyńska-Dyla et al. 2014).

Bamford et al. IFNL4

62

63 A major remaining question is how *IFNL4* evolution has led to it occupying a ‘pro-viral’ role  
64 during HCV infection. To address this question, we explored whether differences in  
65 IFN $\lambda$ 4-mediated antiviral signalling exist between closely-related host species (humans  
66 versus chimpanzees, *Pan troglodytes*) in response to a common pathogen (HCV), taking  
67 advantage of the historical use of experimental infection of chimpanzees.

68

69 To this end, we compared intrahepatic gene expression during early HCV infection in  
70 humans and chimpanzees using published transcriptomic data (see Experimental Procedures).  
71 This revealed distinct host responses in humans and chimpanzees as well as overlapping  
72 differentially-regulated genes (Figure 1A and Supplementary Data File 1). In chimpanzees,  
73 the transcriptional profile was dominated by ISGs known to restrict HCV infection (*RSAD2*,  
74 *IFI27* and *IFIT1*) (Schoggins et al. 2011), as well as genes involved in antigen presentation  
75 and adaptive immunity (*HLA-DMA* and *PSMB8*). These genes were not significantly  
76 differentially expressed in humans, whose response was mainly directed towards up-  
77 regulation of pro-inflammatory genes (for example, *CXCL10*, *CCL18* and *CCL5*) (Figures 1A  
78 and 1B). ‘Chimpanzee-specific’ differentially-expressed genes were induced early in  
79 infection and remained significantly up-regulated during the acute phase (Figure 1B). We  
80 hypothesised that the more robust antiviral response to HCV infection in chimpanzees  
81 compared to humans could arise from host genetic differences.

82

83 Given the marked up-regulation of antiviral ISGs during acute infection in chimpanzees and  
84 relevance of IFN $\lambda$ 4 during HCV infection in humans, we undertook genetic and functional  
85 comparisons of natural human IFN $\lambda$ 4 coding variants and between human and chimpanzee  
86 *IFNL4* orthologues. In humans, we identified 15 non-synonymous HsIFN $\lambda$ 4 variants in the

Bamford et al. IFNL4

87 1000 Genomes Project database (Figure S1A and Supplementary Data File 2), including the  
88 only three previously described variants (C17Y, P60R and P70S; >1% frequency, ‘common’)  
89 (Prokunina-Olsson et al. 2013). The remaining 12 variants were classified as rare (<1%  
90 frequency). Variants were located in functional regions such as the predicted signal peptide  
91 (amino acids 1-24), surrounding the single glycosylation site (N61), and helix F that interacts  
92 with the *IFNλ1* receptor (variants 151–158; Figure 1C). The chimpanzee *IFNL4* gene  
93 (encoding PtIFNλ4) differs from the human orthologue at six amino acid (aa) positions (data  
94 not shown). However, only one, aa154, differed both within humans and between species.

95  
96 Screening the entire panel of HsIFNλ4 variants in antiviral (EMCV, which is a highly IFN-  
97 sensitive virus [Figure 1D]) and ISG mRNA induction assays (*MXI*, Figure S1B and *ISG15*,  
98 data not shown) revealed three out of 15 variants substantially affected activity. Consistent  
99 with previous data (Terczyńska-Dyła et al. 2014), P70S had reduced activity; a similar  
100 decrease in activity was also observed for L79F. By contrast, K154E enhanced antiviral  
101 activity by ~10-fold. These effects on activity did not arise from differences in the levels of  
102 HsIFNλ4 production or glycosylation (Figures S1C and S1D) and for K154E, enhanced  
103 secretion could not explain its higher activity (Figure S1E).

104  
105 Remarkably, glutamic acid (E) is encoded at position 154 in most mammals with an *IFNL4*  
106 orthologue, including chimpanzees (Figure 1E). Therefore, we compared wt HsIFNλ4 and its  
107 K154E variant to wt PtIFNλ4 and an equivalent ‘humanised’ E154K mutant in functional  
108 assays. wt PtIFNλ4 was significantly more active than HsIFNλ4 in each assay and had  
109 approximately equivalent potency to the HsIFNλ4 K154E variant (Figures 1F-1H).  
110 Moreover, PtIFNλ4 E154K had decreased activity similar to wt HsIFNλ4 (encoding lysine at  
111 aa154). Extending the analysis to include rhesus macaque IFNλ4 (*Macaca mulatta*,

Bamford et al. IFNL4

112 MmIFN $\lambda$ 4) gave the same pattern whereby wt MmIFN $\lambda$ 4 with E154 had greater activity than  
113 its K154 variant. By contrast, introducing a lysine into HsIFN $\lambda$ 3 had less of an effect on its  
114 activity (Figure 1F to H). Thus, we conclude that HsIFN $\lambda$ 4 has weaker activity compared to  
115 primate orthologues principally because of a single amino acid change at position 154.

116

117 We next examined the impact of HsIFN $\lambda$ 4 K154E on HCV infection *in vitro* as well as  
118 infectious assays with influenza A virus (IAV) and Zika virus (ZIKV). We also included the  
119 less active P70S and L79F HsIFN $\lambda$ 4 variants in these assays. Using the HCVcc infectious  
120 system, HsIFN $\lambda$ 4 K154E decreased both viral RNA abundance (Figure 2A) and the number  
121 of infected cells (Figure S2A), whereas P70S and L79F were less active than wt HsIFN $\lambda$ 4.  
122 To determine the stage in the HCV life cycle targeted by K154E, we performed assays  
123 examining virus entry (HCV pseudoparticle system [HCVpp]), initial viral RNA translation  
124 and RNA replication (both assessed by the HCV sub-genomic replicon). HsIFN $\lambda$ 4 K154E did  
125 not significantly alter HCVpp entry or translation of replicon RNA compared to wt protein  
126 whereas HCV RNA replication was significantly reduced by the K154E variant (Figure 2B  
127 and Figure S2B and C). HsIFN $\lambda$ 4 K154E also reduced titers of IAV and ZIKV to a greater  
128 extent than wt protein (Figure S2D and S2E). Correspondingly, the P70S and L79F HsIFN $\lambda$ 4  
129 variants were less active than wt protein.

130

131 To examine effects of HsIFN $\lambda$ 4 on global transcription, cells were stimulated with HsIFN $\lambda$ 4s  
132 and their transcriptomes analysed, which revealed that K154E induced the broadest profile of  
133 up-regulated genes (n = 149) compared with either the wt protein (n = 88) or the P70S variant  
134 (n = 71; Figures 2D/E and S2F/G). Many of the shared differentially-expressed genes  
135 included known restriction factors (*IFI27*, *MX1*, *ISG15*), and several unique K154E ISGs  
136 with antiviral activity, such as *IDO1* and *ISG20*, alongside signalling activators such as

Bamford et al. IFNL4

137 *STING* and *IRF1*. From pathway analysis, all HsIFN $\lambda$ s induced similar transcriptional  
138 programmes with differences in the overall significance of these pathways, most notably  
139 enhancement of the antigen presentation and protein ubiquitination pathways with K154E  
140 (Figure S2H). The majority (20/32) of the chimpanzee-specific differentially-regulated genes  
141 (Figures 1A and B) were induced by HsIFN $\lambda$ 4 stimulation, with approximately half of those  
142 being significantly up-regulated with K154E compared to wt, including *MX1*, *IFITM1*, *IFIT1*  
143 and *IFIT3*, *TRIM22* and *IFI44L* (Figure 2F). Together, these data show that similar to  
144 PtIFN $\lambda$ 4, the HsIFN $\lambda$ 4 K154E, which is rarely found in humans, has greater activity and  
145 antiviral potential compared to the wt protein that is common in the human population.

146

147 From further interrogation of human genome datasets (Lachance et al. 2012), the rare  
148 HsIFN $\lambda$ 4 K154E variant was present in two individuals from different African rainforest  
149 ‘Pygmy’ hunter-gatherer populations (Baka and Bakola) in Cameroon (Figure 2G). The  
150 Bakola individual was homozygous for the  $\Delta$ G allele, indicating that the K154E variant can  
151 give rise to functional HsIFN $\lambda$ 4. The Baka subject was heterozygous at rs368234815  
152 ( $\Delta$ G/TT) and thus could produce either wt or the more active K154E form of HsIFN $\lambda$ 4. Each  
153 of these individuals also had additional non-synonymous HsIFN $\lambda$ 4 variants (V158I and  
154 R151P, Baka and Bakola individuals respectively); these variants were included in our  
155 functional screen of HsIFN $\lambda$ 4 variants but did not significantly alter activity (Figures 1D and  
156 S1B). K154E was not found in other African hunter-gatherer populations (such as Hadza and  
157 Sandawe, Figure 2H) nor in the African San, who have the oldest genetic lineages among  
158 humans, nor was it identified in Neanderthal and Denisovan. Notably, the human TT allele  
159 encodes a K154 codon (data not shown) suggesting that the less active E154K substitution  
160 emerged very early during human evolution but not in chimpanzees, our closest living  
161 relative.

Bamford et al. IFNL4

162

163 For decades, experimental studies in chimpanzees have provided unique insight into human  
164 HCV infection (Bukh 2004) but chimpanzees do not present with identical clinical outcomes.  
165 For example, chimpanzees may clear infection more efficiently (Bassett et al., 1998), rarely  
166 develop hepatic diseases similar to humans (Walker 1997) and are refractory to IFN $\alpha$  therapy  
167 (Lanford et al. 2007). Moreover, HCV evolves more slowly in chimpanzees, possibly due to  
168 stronger immune pressure that reduces replication (Ray et al. 2000). We propose that the  
169 enhanced activity observed with PtIFN $\lambda$ 4 contributes to the distinct chimpanzee response to  
170 HCV infection.

171

172 Acute HCV infection in humans and chimpanzees (and human hepatocytes *in vitro*)  
173 selectively stimulates type III over type I IFN production (Park et al. 2012, Thomas et al.  
174 2012). A heightening of the IFN response to HCV has been postulated to explain the capacity  
175 to control HCV infection (Sheahan et al. 2014, Boldanova et al. 2017). Enhanced expression  
176 of ISGs in chimpanzees due to higher IFN $\lambda$ 4 activity could lead to greater inhibition of viral  
177 infection by coordinating a more efficient adaptive immune response, which is critical for  
178 clearance and disease (Thimme et al. 2002). We observed enhanced expression of genes  
179 involved in antigen presentation and T cell mediated immunity alongside HCV restriction  
180 factors in chimpanzees compared to humans and in IFN $\lambda$ 4 K154E stimulation *in vitro*.  
181 Additionally, IFN $\lambda$ 4 can inhibit type I IFN signalling (Fan et al. 2016) and inflammation  
182 (Blazek et al. 2015). Therefore, IFN $\lambda$ 4 with enhanced activity may act as a core co-ordinator  
183 of both protective innate and adaptive immunity.

184

185 Based on available IFN $\lambda$ 1 and IFN $\lambda$ 3 crystal structures (Miknis et al. 2010, Mendoza et al.  
186 2017), the equivalent position to aa154 in IFN $\lambda$ 4 is located on the IFN $\lambda$  receptor (R) 1-



Bamford et al. IFNL4

187 binding helix F, although the glutamic acid side chain faces inward towards the opposing  
188 IL10R2-binding helices (A and D; Figure 2I). This position forms non-covalent  
189 intramolecular interactions with two regions (residues K64/K67 and T108 [IFN $\lambda$ 3 only])  
190 mediated by the free carboxyl group of glutamic acid. In IFN $\lambda$ 4, the E154-interacting  
191 positions are not conserved with IFN $\lambda$ 1/3 but biochemically homologous positions exist (e.g  
192 R60 and R98). We propose that E154K prohibits these critical interactions, reducing  
193 HsIFN $\lambda$ 4 activity via affecting receptor binding. Our data support a direct role on protein  
194 activity rather than altered production or secretion. Additionally, modelling of L79F showed  
195 that leucine sits internally and that replacement with phenylalanine would likely disrupt  
196 packing of the helices (Figure S2I).

197

198 In humans, the E154 variant was found only in African rainforest ‘Pygmy’ hunter-gatherers  
199 from west central Africa (Lachance et al. 2012). A recent study in Pygmies from Cameroon,  
200 including the Baka and Bakola groups, showed low seroprevalence of 0.6% and no evidence  
201 of chronic HCV infection (Foupouapouognigni et al. 2011). By contrast, infection in other  
202 groups in Cameroon has a seroprevalence of ~17% (Njouom et al. 2003). One explanation for  
203 this difference is higher IFN $\lambda$ 4 activity in populations with the K154E variant, which would  
204 enhance HCV clearance and lower endemic transmission. As San and Neanderthal and  
205 Denisovan lacked E154, Pygmy populations likely re-acquired it rather than retaining it  
206 following divergence of chimpanzee and humans. The factors driving divergent evolution of  
207 IFN $\lambda$ 4 within and between species are not known but we speculate that different microbial  
208 burdens might play a role, such as exposure to highly-pathogenic zoonotic infections in the  
209 Congo rainforest (Mulangu et al. 2016), a habitat shared by Pygmies and chimpanzees.

210 Our data beg the question as to why the vast majority of humans do not encode the more  
211 active E154 variant. We propose that it is likely that the apparent selective disadvantage the

Bamford et al. IFNL4

212 less active IFN $\lambda$ 4 K154 allele confers in the face of HCV infection is counterbalanced by  
213 selective advantages in other contexts. For example, type III IFN signalling has been shown  
214 to enhance disease and impede bacterial clearance in mouse models of bacterial pneumonia  
215 (Cohen et al. 2013), suggesting that IFN $\lambda$ 4 with a lower activity could be beneficial during  
216 non-viral infections. To conclude, our study supports a significant and non-redundant role for  
217 IFN $\lambda$ 4 in controlling immunity whose activity has been repeatedly attenuated during human  
218 evolution, commencing with E154K.

219

## 220 **AUTHOR CONTRIBUTIONS**

221 CGGB, EAC and JMcL designed the experiments. CGGB, EAC, ICF, SS and DM conducted  
222 the experiments. CGGB, EAC, SS, AdSF, JLM, KCG, SF and ST provided and analyzed  
223 data. CGGB and JMcL composed the manuscript. All authors critically reviewed the  
224 manuscript.

225

## 226 **ACKNOWLEDGEMENTS**

227 We are grateful to: Chris Boutell and Prof Alain Kohl for IAV and ZIKV respectively; Takaji  
228 Wakita, Ralf Bartenschlager and Arvind Patel for HCV reagents; Sam Wilson and Carol  
229 McWilliam Leitch for critically reading the manuscript. SF and ST were supported by NIH  
230 grants 1R01DK104339-0 and 1R01GM113657-01. This work was funded by the UK Medical  
231 Research Council (MC\_UU\_12014/1).

232

Bamford et al. IFNL4

## 233 **EXPERIMENTAL PROCEDURES**

### 234 **Comparison of human and chimpanzee intrahepatic gene expression during acute HCV** 235 **infection**

236 Previously published datasets of intrahepatic differentially-expressed genes from liver  
237 biopsies were used to compare human and chimpanzee transcriptomic responses to early  
238 HCV infection. Studies focusing on acute HCV infection (0 to 26 weeks) in humans and  
239 chimpanzees were acquired through manual literature search using Pubmed and compiled.  
240 For chimpanzees, data was acquired from 4 studies (Bigger et al. 2001, Su et al. 2002, Nanda  
241 et al. 2008, Yu et al. 2010) and one report was employed for human data (Dill et al. 2012).  
242 The study by Dill et al. comprised single biopsy samples from each of six individuals, while  
243 *in toto* the chimpanzee studies combined data from ten animals with multiple, serial biopsies.  
244 All studies were carried out using similar Affymetrix microarray platforms except Nanda et  
245 al. who used IMAGE clone deposited arrays. Humans were infected with HCV genotype  
246 (gt)1 (n = 2), gt3 (n = 3) and gt4 (n = 1) while chimpanzees were experimentally infected  
247 with HCV gt1a (n = 6), gt1b (n = 3) and gt2a (n = 1). Gene names and fold-changes were  
248 manually converted to a single format (fold change rather than log2 fold change for example)  
249 to allow comparative analysis. Human biopsies were taken between two and five months  
250 after presumed infection following known needle-stick exposure, and serial chimpanzee  
251 biopsies were taken at different time points from between one week and one year following  
252 HCV infection. For comparative purposes, differentially-expressed genes in chimpanzees  
253 were included if they were detected during a time period overlapping with the human data.  
254 We identified a ‘core’ set of chimpanzee differentially-expressed genes (independently  
255 characterized in at least two studies) and compared them to the single human transcriptome  
256 study data at equivalent time points (between 8 and 20 weeks post-infection). This approach  
257 generated a set of core chimpanzee genes (genes found differentially-expressed in at least 2

Bamford et al. *IFNL4*

258 studies, >2 fold change compared to controls and during the time frame compared to humans)  
259 for comparison with the human data. This is reflected in the ten-fold higher numbers of  
260 differentially-regulated genes found in the one human study compared to the ‘core’  
261 (narrowed down) set assembled from four chimpanzee studies. These gene sets were  
262 compared to determine their degree of species-specificity or species-similarity using Venn  
263 diagram analysis (<http://bioinfogp.cnb.csic.es/tools/venny/>). The gene lists of humans and  
264 core genes for chimpanzees are shown in the Supplementary Data File 1. For the  
265 chimpanzee-specific genes, mean expression values were determined at each time point from  
266 individual animals.

267

#### 268 **IFN $\lambda$ gene sequence analysis**

269 Complete known human *IFNL4* genetic variation along with associated frequency and  
270 ethnicity for the human population were collected from the 1000 Genomes database available  
271 at the time of study (June 2016) (<http://browser.1000genomes.org/index.html>). The reference  
272 sequence for the human genome contains the frameshift ‘TT’ allele and so potential effects of  
273 variants on the HsIFN $\lambda$ 4 predicted amino acid sequence were identified manually following  
274 correction for the frameshift mutation (TT to  $\Delta$ G). The effect of all single nucleotide  
275 polymorphisms (SNPs) on the open reading frame (ORF) was thus assessed and re-annotated  
276 as synonymous or non-synonymous resulting in the selection of coding variants reported  
277 here. Inspection of whole genome sequence data from African hunter-gatherers was carried  
278 out using previously published datasets (Lachance et al. 2012). We remapped the raw reads  
279 of six San individuals (four Jul’hoan and two  $\ddot{z}$ Khomani San) in the Simon Genomic  
280 Diversity Project (Mallick et al. 2016) to human reference genome (hg19) and conducted  
281 variant calling using the haplotype caller module in GATK (v3). Two Jul’hoan individuals  
282 were heterozygous at rs368234815 (TT/ $\Delta$ G genotype, Supplementary Data File 2). The

Bamford et al. IFNL4

283 genotypes of rs368234815 in Neanderthal and Denisovan were extracted from VCF files that  
284 were downloaded from [http://cdna.eva.mpg.de/denisova/VCF/hg19\\_1000g/](http://cdna.eva.mpg.de/denisova/VCF/hg19_1000g/) and  
285 <http://cdna.eva.mpg.de/neandertal/altai/AltaiNeandertal/VCF/>. Neanderthal and Denisovan  
286 all contained only  $\Delta G$  alleles (Supplementary Data File 2). Amino acid sequences for  
287 mammalian IFN $\lambda$  genes were obtained from NCBI following protein BLAST of the wt  
288 HsIFN $\lambda 4$  polypeptide sequence. Multiple alignments of IFN $\lambda$  amino acid sequences were  
289 performed by MUSCLE using MEGA7. Accession numbers of specific IFN $\lambda$ s used in the  
290 experimental section of this study were as follows: HsIFN $\lambda 3$ : Q8IU54; HsIFN $\lambda 3$ , Q8IZI9.2;  
291 and for IFN $\lambda 4$ : *Homo sapiens* AFQ38559.1; *Pan troglodytes* AFY99109.1; *Macaca mullata*  
292 XP\_014979310.1; *Pongo abelii* (orangutan) XP\_009230852.1, *Bos taurus* (cow)  
293 XP\_005219183.1, *Felis catus* (cat) XP\_011288250.1.

294

### 295 **Structural modelling**

296 A homology model of the HsIFN $\lambda 4$  structure was generated using the RaptorX online server  
297 (<http://raptorx.uchicago.edu>). The resultant HsIFN $\lambda 4$  structural model was then structurally  
298 aligned with both HsIFN $\lambda 1$  (PDB 3OG6) (Miknis et al. 2010) and HsIFN $\lambda 3$  (PDB 5T5W)  
299 (Mendoza et al. 2017). Visualization, structural alignments, and figures were generated in  
300 Pymol (The PyMOL Molecular Graphics System, Version 1.8).

301

### 302 **Recombinant DNA manipulation and generation of IFN $\lambda$ expression plasmids**

303 DNA sequences encoding the ORFs of HsIFN $\lambda 4$ , PtIFN $\lambda 4$  and MmIFN $\lambda 4$  (based on  
304 accession sequences above) were synthesized commercially with a carboxy-terminal  
305 DYKDDDDK/FLAG tag using GeneStrings or Gene Synthesis technology (GeneArt). As a  
306 positive control for functional assays, the HsIFN $\lambda 3$  ORF was codon optimised (human) to  
307 ensure robust expression and antiviral activity and is termed 'HsIFN $\lambda 3op$ '. All IFN $\lambda 4$  coding

Bamford et al. IFNL4

308 region sequences were retained as the original nucleotide sequence without optimisation.  
309 This precluded a direct functional comparison of HsIFN $\lambda$ 3op and wt HsIFN $\lambda$ 4. Synthesized  
310 DNA was cloned into mammalian expression vectors (pCI, Promega) using standard  
311 molecular biology techniques. At each cloning step, the complete ORF was sequenced to  
312 ensure no spurious mutations had occurred during plasmid generation and  
313 manipulation. Single amino acid changes were incorporated using standard site-directed  
314 mutagenesis protocols (QuickChange site-directed mutagenesis kit [Agilent], or using  
315 overlapping oligonucleotides and Phusion PCR).

316

### 317 **Cell lines**

318 A549 (human lung adenocarcinoma), Huh7 (human hepatoma), HEK293T (human  
319 embryonic kidney), U2OS (human osteosarcoma), Vero (African Green Monkey kidney)  
320 and MDCK (Madin-Darby canine kidney) cells were grown in DMEM growth media  
321 supplemented with 10% FBS and 1% penicillin-streptomycin. Non-differentiated human  
322 hepatic progenitor HepaRG cells and derivatives were cultured in William's E medium  
323 supplemented with 10% of FBS, 1% penicillin-  
324 streptomycin, hydrocortisone hemisuccinate (50  $\mu$ M) and human insulin (4  $\mu$ g/mL). All cells  
325 were grown at 37°C with 5% CO<sub>2</sub>.

326

### 327 **Plasmid transfection and production of functional IFN $\lambda$**

328 Plasmid DNA generated by midiprep of bacterial cultures (GeneJET plasmid midiprep kit,  
329 ThermoScientific) was introduced into cells by lipid-based transfection using  
330 Lipofectamine 2000 or Lipofectamine 3000 (ThermoFisher) following manufacturer's  
331 instructions. To produce IFN-containing conditioned media (CM) or measure protein  
332 production, HEK293T 'producer' cells were grown to near-confluency in 12 (~4 x 10<sup>5</sup> cells

Bamford et al. IFNL4

333 per well) or 6-well ( $\sim 1.2 \times 10^6$  cells per well) plates and transfected with plasmids (2  $\mu$ g)  
334 in OptiMEM (1-2 mL) overnight. At approximately 16 hours (hrs) post transfection  
335 (hpt), OptiMEM was removed and replaced with complete growth media (1-2 mL). CM  
336 containing the extracellular IFN $\lambda$ s was harvested at 48 hpt and stored at -20°C before use.  
337 Although antiviral activity was observed at 16 hpt, we chose 48 hpt to harvest CM to ensure  
338 robust production and secretion of each IFN $\lambda$ . Intracellular IFN $\lambda$ s also were harvested from  
339 transfected cells at 48 hpt. CM was removed and replaced with fresh DMEM 10% FCS (2  
340 mL) and then frozen at -70°C. To prepare cell lysates with IFN $\lambda$  activity, plates were thawed  
341 and the cell monolayer was scraped into the media and clarified by centrifugation (5 minutes  
342 [mins] x 300 g) before use. CM or lysates were diluted in the respective growth medium for  
343 each cell line before functional testing as described in the text.

344

345 **Relative quantification of RNA by reverse transcriptase-quantitative polymerase chain**  
346 **reaction (RT-qPCR)**

347 Total cellular RNA was isolated by a column-based guanidine thiocyanate extraction using  
348 RNeasy Plus Mini kit (genomic DNA removal 'plus' kit, Qiagen) and following the  
349 supplier's protocol. cDNA was synthesised by reverse transcribing RNA (1  $\mu$ g) using random  
350 primers and the AccuScript High Fidelity Reverse Transcriptase kit (Agilent Technologies);  
351 the recommended protocol was followed. Relative expression of mRNA was quantified by  
352 qPCR (7500 Real-Time PCR System, Applied Biosystems) of amplified cDNA. Probes for  
353 *ISG15* (Hs01921425), *Mx1* (Hs00895608) and the control *GAPDH* (402869) were used  
354 with TaqMan Fast Universal PCR Master Mix (Applied Biosystems). The results were  
355 normalised to *GAPDH* and presented in  $2^{-\Delta\Delta C_t}$  values relative to controls as described in the  
356 text. HCV genomic RNA was quantified by RT-qPCR as described previously (Jones et al.  
357 2010).

Bamford et al. IFNL4

### 358 **Global transcriptomic measurements and corresponding pathway analysis**

359 IFN-competent cells (A549) were stimulated with IFN CM (1:4 dilution) in 6-well plates  
360 (~1.2 x 10<sup>6</sup> cells) for 24 hrs and global gene expression was assessed by RNA-Seq, using  
361 three biological replicates per condition. Sample RNA concentration was measured with a  
362 Qubit Fluorometer (Life Technologies) and RNA integrity was determined using an Agilent  
363 4200 TapeStation. All samples had a RNA integrity number of 9 or above. 1.5 µg of total  
364 RNA from each sample was prepared for sequencing using an Illumina TruSeq Stranded  
365 mRNA HT kit according to the manufacturer's instructions. Briefly, polyadenylated RNA  
366 molecules were captured, followed by fragmentation. RNA fragments were reverse  
367 transcribed and converted to dsDNA, end repaired, A-tailed, ligated to indexed adaptors and  
368 amplified by PCR. Libraries were pooled in equimolar concentrations and sequenced in an  
369 Illumina NextSeq 500 sequencer using a high output cartridge, generating approximately 25  
370 million reads per sample, with a read length of 75 bp. 96.3% of the reads with Q score of 30  
371 or above. Data was demultiplexed and fastq files were generated on a bio-linux server using  
372 bcl2fastq version v2.16. RNA-Seq analysis was performed using the Tuxedo protocol  
373 (Trapnell et al. 2012). Differential gene expression was considered significant when the  
374 observed fold change was  $\geq 2.0$  and FDR/q-value was  $< 0.05$  between comparisons. Pathway  
375 analysis was carried out using Ingenuity Pathway Analysis [IPA] (Ingenuity Systems,  
376 Redwood City, CA, USA).

377

### 378 **Western blot analysis**

379 Cell growth media was removed and monolayers were rinsed once with approximately 0.5mL  
380 PBS before lysis using RIPA buffer (ThermoFisher) containing protease inhibitor cocktail  
381 (1x Halt Protease inhibitor cocktail, ThermoFisher, or cOmplete™, Mini, EDTA-free  
382 Protease Inhibitor Cocktail, Sigma Aldrich) for 10 mins at 4°C before being frozen at -20 °C



Bamford et al. IFNL4

383 overnight. Lysates were collected into a 1.5 mL sample tube and clarified by centrifugation  
384 (max speed for 15 mins). Samples (10  $\mu$ l) from the soluble fraction were heated to 90°C for  
385 10 mins with 100 mM dithiothreitol (DTT)-containing reducing lane marker at 90°C for 10  
386 mins. Samples were run on home-made 12% SDS-PAGE gels alongside molecular weight  
387 markers (Pierce Lane marker, ThermoFisher) before wet-transfer to a nitrocellulose  
388 membrane. Membranes were blocked using a solution of 50% PBS and 50% FBS for 1  
389 hour at room temperature and then incubated overnight at 4°C with primary antibodies in  
390 50% PBS, 50% FBS and 0.1% TWEEN 20. Secondary antibodies were incubated in 50%  
391 PBS, 50% FBS and 0.1% TWEEN for 1 hour at room temperature. Membranes were washed  
392 four times (5 mins each) following each antibody incubation with PBS containing 0.1%  
393 TWEEN 20. After the 4<sup>th</sup> wash following incubation with the secondary antibody, the  
394 membrane was washed once more in PBS (5 mins) and kept in ddH<sub>2</sub>O until imaging. Primary  
395 antibodies to the FLAG tag (1:1000) (rabbit, lot. 064M4757V) and  $\alpha$ -  
396 tubulin (1:10000) (mouse, lot. GR252006-1) were used along with infra-red secondary  
397 antibodies (LI-COR) to anti-rabbit (donkey [1:10,000], 926-68073) and anti-mouse (donkey  
398 [1:10,000], C50422-05) to allow protein visualisation. Pre-stained, Pagerule Plus marker was  
399 used to determine molecular weights (ThermoFisher). Membranes were visualised using  
400 the LI-COR system on an Odyssey CLX and the relative expression level of proteins  
401 determined using LI-COR software (Image Studio).

402

#### 403 **Generation and use of IFN reporter cell lines**

404 An IFN reporter HepaRG cell line was generated to measure the activity of IFNs by  
405 introducing the EGFP ORF fused to the ISG15 ORF separated by ribosome skipping sites by  
406 CRISPR/Cas9 genome editing. We chose to introduce EGFP in-frame to the N-terminus of  
407 the *ISG15* ORF because it is a robustly-induced ISG. To facilitate this we also introduced

Bamford et al. IFNL4

408 the blasticidin resistance gene (BSD). BSD, EGFP and ISG15 were separated using ribosome  
409 skipping 2A sequences (P2A and T2A). Transgene DNA was flanked by homology arms  
410 with reference to the predicted target site. Homology donor plasmids for CRISPR/Cas9  
411 knock-in were generated through a series of overlapping PCR amplifications using Phusion  
412 DNA polymerase followed by sub-cloning into pJET plasmid. Plasmids for CRISPR/Cas9  
413 genome editing (wt SpCas9) were generated using established protocols (Ran et al. 2013) in  
414 order to generate plasmids that would direct genome editing at the 5' terminus of the  
415 HsISG15 ORF (exon 2). pSpCas9(BB)-2A-Puro (PX459) V2.0 was a gift from Feng Zhang  
416 (Addgene plasmid # 62988). All sequences are available by request. HepaRG cells grown in  
417 6 well dishes were co-transfected with CRISPR/Cas9 editing plasmids targeting the  
418 beginning of the ISG15 ORF in exon 2 (exon 1 contains only the ATG of the ORF), and  
419 homology donor plasmids described above (1 µg each) using Lipofectamine 2000 and the  
420 protocol described above. Transfected cells were selected using puromycin (Life  
421 Technologies) (1 µg/mL) and blastocidin (Invivogen) (10 µg/mL) until non-transfected cells  
422 were no longer viable. Selected cells were cloned by single cell dilution, expanded and tested  
423 for EGFP induction following IFN stimulation. Positioning of the introduced transgene was  
424 assessed by PCR amplification on isolated genomic DNA from individual clones (data not  
425 shown). Primers were designed to include one primer internal to the transgene and another  
426 external to the transgene and found in the target loci (sequences available on request). For use  
427 as an effective IFN reporter cell line, cells had to demonstrate robust induction of EGFP  
428 expression following stimulation with IFN and have evidence of specific introduction of the  
429 transgene. This study uses clone 'G8' of HepaRG.EGFP-BSD-ISG15 cells. However, we  
430 have not tested whether there is a single transgene integration site or multiple ones nor  
431 confirmed that the EGFP produced following stimulation by IFNs results from the expression  
432 of the specifically-introduced transgene rather than off-target integration, which is

Bamford et al. IFNL4

433 theoretically possible. However, we do not predict this would affect the cells' ability to act as  
434 a reporter cell line. For use in IFN reporter assays, stimulated cells (in 96 well plates  
435 stimulated for 24 hrs;  $\sim 5 \times 10^4$  cells per well) were washed, trypsinised and fixed in formalin  
436 (1% in PBS) at room temperature for 10 mins in the dark before being transferred to a round-  
437 bottomed plate and stored at 4°C in the dark until measurement. Non-stimulated cells were  
438 used as negative controls and the change in % EGFP-positive cells was assessed by flow  
439 cytometry using a Guava easyCyte HT (Merck Millipore).

440

#### 441 **Production of virus stocks for antiviral assays**

442 Antiviral activity of IFN $\lambda$ s was determined using encephalomyocarditis virus (EMCV),  
443 influenza A virus (IAV; A/WSN/1933(H1N1)), Zika virus (ZIKV; Brazilian strain PE243)  
444 (Donald et al. 2016) and HCV (HCVcc chimeric clone Jc1) (Pietschmann et al. 2006).  
445 EMCV was obtained from and amplified on Vero cells and titrated on U2OS cells by plaque  
446 assay. IAV stocks were generated on MDCK cells and titrated by plaque assay on MDCK  
447 cells with protease (TPCK-treated trypsin, Sigma Aldrich). ZIKV was titrated on Vero cells  
448 by plaque assay. For all plaque assays, cells were grown in 12 or 6-well plates to  $\sim 90\%$   
449 confluency before inoculation with serial ten-fold dilutions of virus stocks in serum-free  
450 Optimum. Inoculum remained on the cells for two hrs before being removed and the  
451 monolayers were rinsed with PBS (1 x) and semi-solid Avicell overlay (Sigma Aldrich) was  
452 added. For EMCV and IAV, 1.2% avicell was used, diluted in 1X DMEM 10% FCS, 1%  
453 penicillin-streptomycin. For IAV titration, TPCK-treated trypsin was added (1  $\mu\text{g}/\text{mL}$ ). For  
454 ZIKV plaque assay, 2X MEM was used instead of 1X DMEM. HCVcc Jc1 was generated as  
455 described previously by electroporation of *in vitro* transcribed RNA into Huh7 cells and  
456 harvested at 72 hrs post electroporation. After filtration of the supernatant, HCVcc Jc1 stocks  
457 were titrated by TCID<sub>50</sub> on Huh7 cells and stored at 4°C before use. HCVcc Jc1 TCID<sub>50</sub>

Bamford et al. IFNL4

458 assays were performed using anti-NS5A antibody (Lindenbach et al. 2005). Infected cells at  
459 72 hrs post infection were fixed and permeabilised with ice-cold methanol. Cells were rinsed  
460 in PBS, blocked with FCS at room temperature, incubated overnight with mouse monoclonal  
461 anti-NS5A antibody (9E10) at 4°C. After removal of the antisera, cells were rinsed 3 times  
462 with PBS containing 0.1% TWEEN 20, and then incubated in the dark at room temperature  
463 for 1 hour with secondary antibody [Alexa-fluor 488nm anti-mouse (donkey)]. Cells were  
464 finally washed with PBS containing 0.1% TWEEN 20 and NS5A-expressing cells were  
465 visualized with a fluorescent microscope.

466

#### 467 **Antiviral assays**

468 Cells stimulated with IFNs were infected with viruses at the following multiplicities of  
469 infection (MOI): EMCV (MOI = 0.3; added directly to the media); IAV (MOI = 0.01); ZIKV  
470 (MOI = 0.01); HCVcc (MOI = 0.05). For IAV, ZIKV and HCVcc, the inoculum was  
471 incubated with cells for at two (IAV/ZIKV) or three hrs (HCVcc) in 0.5–1.0 mL serum-free  
472 Opti-MEM/DMEM at 37°C before removal. Cells were rinsed with PBS and then incubated  
473 with fresh growth media for the allotted time (24 hrs for EMCV, 48 hrs for IAV and 72 hrs  
474 for ZIKV and HCVcc). At the times stated for individual experiments, infected-cell  
475 supernatants were harvested and infectivity was titrated by plaque assay. IAV, ZIKV and  
476 HCVcc antiviral assays were all carried out in 12 well plates except for measurement of  
477 HCVcc infectivity by indirect immunofluorescence, which was measured in a 96 well plate.  
478 In the case of EMCV, a cytopathic effect (CPE) protection assay was employed to assess  
479 infectivity (Mohamed et al. 2009). Here, HepaRG cells were plated in a 96-well plates (~5 x  
480 10<sup>4</sup> cells per well) and, when confluent, were incubated with two-fold serial dilutions of CM  
481 or lysate for 24 hrs before the addition of EMCV. At 24 hrs post infection with EMCV media  
482 was removed; cell monolayers were rinsed in PBS and stained using crystal violet (1% in

Bamford et al. IFNL4

483 20% ethanol in H<sub>2</sub>O) for 10 mins. Crystal violet stain was then removed and stained plates  
484 were washed in water. The dilution of ~50% inhibition of EMCV-induced CPE was marked  
485 visually and the difference determined relative to wt HsIFNL4.

486

487 Luciferase-expressing MLV pseudoparticles with (JFH1 HCV E1E2) were generated as  
488 described (Cowton et al. 2016) along with their corresponding E1E2 deficient controls  
489 (particles generated only with MLV core) and used to challenge IFN-stimulated Huh7  
490 cells. Huh7 cells grown in 96-well plates overnight (seeded at 4 x 10<sup>3</sup> cells per well) were  
491 stimulated with IFNs for 24 hrs and transduced with HCVpp. 72 hrs later, cell lysates were  
492 harvested and luciferase activity was measured (Luciferase assay system, Promega) on a plate  
493 reading luminometer.

494

495 For HCV RNA replication assays, RNA was transcribed *in vitro* from a sub-genomic replicon  
496 (HCV-SGR) expressing GLuc (wild-type and non-replicating GND) (Domingues et al. 2015).  
497 *In vitro* transcribed RNA (200 ng) was transfected using PEI (1:1) into monolayers of Huh7  
498 cells in 96-well plates overnight (seeded at 4 x 10<sup>3</sup> cells per well) that had been stimulated  
499 with IFNs (24 hrs). At the specified time points, total supernatants (containing the  
500 secreted GLuc) from treated Huh7 cells were collected and replaced with fresh growth media.  
501 20µL (~10% of total volume) was used to measure luciferase activity and mixed  
502 with GLuc substrate (1x) (50 µL) and luminescence (as relative light units, RLU) was  
503 determined using a luminometer (Promega GloMax). Pierce *Gaussia* Luciferase Flash Assay  
504 Kit (ThermoFisher) was used and the manufacturer's instructions were followed.

505

506 **Statistical analysis**

Bamford et al. IFNL4

507 For non-transcriptomic analysis (outlined above), Graphpad Prism was used for statistical

508 testing, which included Students' T test and ANOVA as described in figure legends. \*\*\* =

509 <0.001; \*\* = <0.01; \* = <0.05, are used throughout to denote statistical significance.

510

511 **FIGURE LEGENDS**

512

513 **Figure 1. Human IFN $\lambda$ 4 is less active than chimpanzee IFN $\lambda$ 4**

514 A) Numbers of shared and unique differentially-expressed genes in liver biopsies from  
515 HCV-infected humans (blue) and experimentally-infected chimpanzees (orange)  
516 during the acute phase of infection represented as a Venn diagram (also see  
517 Supplementary Data File 1). Gene expression during a time period of between 8 and  
518 20 weeks was used where comparable published data for both species exists. The top  
519 ten species-specific, differentially-expressed genes are shown ranked by levels of  
520 expression.

521 B) Expression of ‘chimpanzee-specific’ differentially-expressed genes over time (n = 32).  
522 Chimpanzee-specific genes are shown as a combined mean (orange line) and range  
523 (grey lines) of fold-change from all studies where any gene of the 32 genes was  
524 available over at most ~1 year of infection. The time period of 8 to 20 weeks that  
525 overlaps with the equivalent human genes which are differentially expressed is boxed  
526 (blue); at this time the 32 genes were not observed in human datasets.

527 C) Location of non-synonymous variants in the HsIFN $\lambda$ 4 polypeptide (underlined pink).  
528 Regions of predicted structural significance are boxed (green), including the signal  
529 peptide (sp) and helices (A to F) (Hamming et al. 2013). Note that there are 2 non-  
530 synonymous changes at C17 (C17R and C17Y). See Supplementary Data File 2 for  
531 genetic identifiers for SNPs described here.

532 D) Antiviral activity of all HsIFN $\lambda$ 4 natural variants and wt in an anti-EMCV CPE assay  
533 relative to wt protein in HepaRG cells. Cells were stimulated with serial dilutions of  
534 HsIFN $\lambda$ 4-containing conditioned media (CM) for 24 hrs and then infected with  
535 EMCV (MOI = 0.3 PFU/cell) for 24 hrs at which point CPE was assessed by crystal

536 violet staining. After staining, the dilution providing ~50% protection was determined.  
537 Variants HsIFN $\lambda$ 4 P70S (blue), HsIFN $\lambda$ 4 L79F (yellow) and HsIFN $\lambda$ 4 K154E (purple)  
538 have the greatest effect on antiviral activity (>2-fold and significant: \*\* for P70S and  
539 L79F; \*\*\* for K154E). Combined data from three independent experiments are  
540 shown. \*\*\* = <0.001; \*\* = <0.01 by unpaired, two-tailed Student's T test. Controls  
541 (HsIFN $\lambda$ 4-TT and EGFP) are not shown but gave zero protection.

542 E) Segment of an amino acid alignment (amino acids 151 to 157) of selected orthologues  
543 of HsIFN $\lambda$ 4 from different species as well as 2 human paralogues HsIFN $\lambda$ 1 and  
544 HsIFN $\lambda$ 3. At position 154, HsIFN $\lambda$ 4 encodes a lysine (K; blue) while sequences from  
545 all other species predict a glutamic acid at this position (E; red).

546 F) Antiviral activity of IFN $\lambda$  from the different species indicated (human [Hs],  
547 chimpanzee [Pt] and macaque [Mm]) encoding an E (red bars) or K (black bars) at  
548 position 154 alongside the equivalent amino acid substitution in HsIFN $\lambda$ 3op in an anti-  
549 EMCV CPE assay relative to wt HsIFN $\lambda$ 4 in HepaRG cells. Order denotes wt then  
550 variant IFN $\lambda$ . Data show +/- SD (n = 3 replicates) and are representative of two  
551 independent experiments. \*\*\* = <0.001; \* = <0.05 by unpaired, two-tailed Student's T  
552 test.

553 G) IFN signalling reporter assay for mutant IFN $\lambda$ 4s from different species encoding an E  
554 (red lines) or K (black lines) at position 154 alongside the equivalent change in  
555 HsIFN $\lambda$ 3op. HsIFN $\lambda$ 4 = triangles; PtIFN $\lambda$ 4 = squares; MmIFN $\lambda$ 4 = stars; HsIFN $\lambda$ 3 =  
556 inverted triangles. Serial two-fold dilutions of CM (1:2 to 1:2097152) were incubated  
557 with an IFN reporter cell line (HepaRG.EGFP-ISG15). EGFP-positive cells (%) were  
558 measured by flow cytometry at each dilution. Data shown are +/- SEM (n = 3  
559 replicates) and are representative of two independent experiments. Comparison of all E



560 versus K substituted forms of IFN $\lambda$ 4 within a homologue yielded significance values  
561 ( $p = <0.001$  by Two-way ANOVA).

562 H) *MXI* gene expression by RT-qPCR for mutant IFN $\lambda$ 4s from different species encoding  
563 an E (red bars) or K (black bars) at position 154 alongside the equivalent change in  
564 HsIFN $\lambda$ 3op. Data represent the relative fold change of *MXI* by RT-qPCR in cells  
565 stimulated with CM (dilution 1:4) for 24 hrs compared to HsIFN $\lambda$ 4 wt. Data show +/-  
566 SEM (n = 6 replicates) combined from two independent experiments. \*\*\* =  $<0.001$ ;  
567 \*\* =  $<0.01$  by unpaired, two-tailed Student's T test.

568

569 **Figure 2. K154E enhances antiviral activity of IFN $\lambda$ 4 but is very rarely found in the**  
570 **human population**

571 A) Antiviral activity of HsIFN $\lambda$ 4 variants against HCVcc infection in Huh7 cells  
572 measured by RT-qPCR. HsIFN $\lambda$ -containing CM (1:3) was incubated with Huh7  
573 cells for 24 hrs before infection with HCVcc Jc1 (MOI = 0.01). HCV RNA was  
574 measured by RT-qPCR on RNA isolated at 72hpi. Results shown are relative to  
575 infection in cells treated with EGFP CM. Data show +/- SEM (n = 6 replicates)  
576 combined from two independent experiments. \* =  $<0.05$  by unpaired, two-tailed  
577 Student's T test.

578 B) The effect of HsIFN $\lambda$ 4 on JFH1 HCV pseudoparticle (pp) infectivity in Huh7  
579 cells. Relative light units (RLU) in the media of luciferase-expressing MLV  
580 pseudoparticles following inoculation of Huh7 cells stimulated with CM (1:3),  
581 relative (%) to CM from EGFP-transfected cells. Luciferase activity was  
582 measured at 72 hrs after inoculation. Error bars show +/- SEM from experiments  
583 performed in triplicate. \* =  $<0.05$ ; ns = not significant by Student's T test.

- 584 C) The effect of HsIFN $\lambda$ 4 CM on transient HCV RNA replication using a  
585 subgenomic replicon assay in Huh7 cells. Huh7 cells were treated with CM (1:3)  
586 for 24 hrs before transfection with *in vitro* transcribed JFH1 HCV-SGR RNA  
587 expressing *Gaussia* luciferase. RLU secreted into the media was measured at 4,  
588 24, 48 and 72 hpt. CM was obtained from cells transfected with EGFP (green),  
589 HsIFN $\lambda$ 4 wt (orange), HsIFN $\lambda$ 4 P70S (cyan), HsIFN $\lambda$ 4 L79F (yellow), HsIFN $\lambda$ 4  
590 K154E (purple) and HsIFN $\lambda$ 3op (red). Error bars show +/- SD from experiments  
591 performed in triplicate. Data are representative of two independent experiments.  
592 \*\*\* = <0.001 by two-way ANOVA.
- 593 D) Violin plot of significant, differentially-expressed genes (log<sub>2</sub> fold change  
594 compared to RNA from cells treated with EGFP CM 1:4 dilution) by RNA-Seq in  
595 A549 cells stimulated with different HsIFN $\lambda$ s for 24 hrs. CM was obtained from  
596 cells transfected with HsIFN $\lambda$ 3op (red); HsIFN $\lambda$ 4 wt (green); HsIFN $\lambda$ 4 P70S  
597 (cyan), and HsIFN $\lambda$ 4 K154E (purple).
- 598 E) Comparison of differentially-expressed genes (significant and at least 2-fold  
599 difference) stimulated by the HsIFN $\lambda$ 4 variants (HsIFN $\lambda$ 4 wt in green, HsIFN $\lambda$ 4  
600 P70S in cyan and HsIFN $\lambda$ 4 K154E in purple) illustrated by a Venn diagram  
601 showing shared and unique genes. Three examples in overlapping and unique  
602 areas of the Venn diagram are highlighted.
- 603 F) Heat map of log<sub>2</sub> fold change in RNA-Seq transcripts induced by the HsIFN $\lambda$ 4  
604 variants from Figure 2D and 2E for chimpanzee-specific genes (n = 32) from  
605 Figure 1A.
- 606 G) Geographical location and frequency of HsIFN $\lambda$ 4 K154E in African hunter-  
607 gatherer genomes (Pygmy, n = 5 individuals, Sandawe (S) n = 5 individuals and  
608 Hadza (H) n = 5 individuals). Two Pygmy individuals within two tribes (Baka and

609 Bakola) were found to encode the HsIFN $\lambda$ 4 K154E variant. HsIFN $\lambda$ 4 genotype  
610 and additional nonsynonymous variants detected are shown. Variants tested in our  
611 functional screen with no significant effect on antiviral activity are indicated (\*).  
612 H) Presence of HsIFN $\lambda$ 4 E154 (purple) versus HsIFN $\lambda$ 4 K154 (green) on a  
613 cladogram of human and chimpanzee evolution. Archaic human (Neanderthal and  
614 Denisovan) as well as other basal human populations (San, Sandawe and Hadza)  
615 only encode HsIFN $\lambda$ 4 K154. Earliest detection of the HsIFN $\lambda$ 4 TT frameshift and  
616 activity-reducing HsIFN $\lambda$ 4 P70S and HsIFN $\lambda$ 4 L79F variants are shown.  
617 I) Modelled structure of HsIFN $\lambda$ 4 showing position 154 at a central location in the  
618 molecule with reference to receptor subunit-binding interfaces (IFN $\lambda$ R1 and  
619 IL10R2). Overlapping crystal structures for HsIFN $\lambda$ 1 (green) and HsIFN $\lambda$ 3 (dark  
620 blue) are overlaid together with a homology model for HsIFN $\lambda$ 4 (\*, light blue). In  
621 the overlapping structures, the homologous position for HsIFN $\lambda$ 4 E154 makes  
622 intramolecular non-covalent interactions with two distinct regions within IFN $\lambda$ .

623

624 **Figure S1.**

625 A) Ancestry-based localization and frequency of human non-synonymous variants of  
626 HsIFN $\lambda$ 4 in African (AFR), South Asian (SAS), East Asian (EAS), European  
627 (EUR) and American (AMR) populations within the 1000 Genomes dataset. ‘n’  
628 represents the number of alleles tested in each population. Common and rare  
629 variants are those which have frequencies of >1% and <1% respectively in the  
630 1000 Genome data. Common variants include: wt (orange), C17Y (light green),  
631 R60P (dark green) and P70S (cyan). Rare variants (purple) include: A8S, C17R,  
632 R25Q, S56R, P73S, L79F, K133M, V134A, R151P, K154E, S156N, V158I.  
633 Variants K133M and S156N (black) did not have ethnicity associated with them

634 but were found in the dataset from the Netherlands (Genome of the Netherlands  
635 cohort).

636 B) *MX1* gene expression determined by RT-qPCR following stimulation of cells with  
637 HsIFN $\lambda$ 4 variants. Relative fold change of genes in HepaRG cells stimulated with  
638 CM from plasmid-transfected cells compared to CM from mock-transfected cells  
639 (1:4) for 24 hrs. Additional HsIFN $\lambda$ 4 variants are shown as controls (the  
640 frameshift HsIFN $\lambda$ 4 TT, a non-natural non-glycosylated HsIFN $\lambda$ 4 N61A variant  
641 as well as HsIFN $\lambda$ 4 F159A and HsIFN $\lambda$ 4 L162A [both of which are predicted to  
642 reduce interaction with the IFN $\lambda$ R1 receptor subunit and hence lower activity  
643 based on (Gad et al. 2009). Data are shown relative to mock-stimulated cells. Data  
644 shown are +/- SEM (n = 3).

645 C) Representative blot showing production of intracellular HsIFN $\lambda$ 4 variants by  
646 Western blot analysis of lysates from plasmid-transfected producer HEK293T  
647 cells as measured with an anti-FLAG ('F') primary antibody. Tubulin ('T') was  
648 used as a loading control. Cells either mock-transfected, transfected with an  
649 irrelevant plasmid (EGFP) or transfected with the frameshift IFN $\lambda$ 4 TT variant  
650 were used as negative controls. Upper (glycosylated; G) and lower (non-  
651 glycosylated; NG) forms of HsIFN $\lambda$ 4 are highlighted. A non-specific band in the  
652 EGFP-transfected extract is shown (\*).

653 D) Quantification of intracellular glycosylated (green) and non-glycosylated (blue)  
654 HsIFN $\lambda$ 4 variants by Western blot analysis of lysates from plasmid-transfected  
655 producer HEK293T cells. Data shown are +/- SEM combined from three  
656 independent experiments.

657 E) Comparative functional activity of intracellular and cell-released HsIFNL4 wt  
658 (WT) and the HsIFN $\lambda$ 4 K154E variant in the EMCV antiviral assay. Cells were

659 either directly lysed (0 washes) or washed with PBS (3x washes) after removal of  
660 CM. Data for CM (supt) and cell lysates (lys) are shown.

661 F) Production of intracellular IFN $\lambda$ 4 from different species encoding E or K at  
662 position 154 alongside the equivalent change in HsIFN $\lambda$ 3op by Western blot  
663 analysis of lysates from plasmid-transfected producer HEK293T cells. The IFN $\lambda$ 4  
664 variants were detected with an anti-FLAG antibody ('F'). Tubulin ('T') was used  
665 as a loading control. Mock- and EGFP-transfected cells were used as negative  
666 controls.

667

668 **Figure S2.**

669 A) Antiviral activity of HsIFN $\lambda$ 4 wt and HsIFN $\lambda$ 4 variants against HCVcc infection  
670 in Huh7 cells by determining virus antigen-positive cells (HCV NS5A protein).  
671 CM containing HsIFN $\lambda$ 3op and HsIFN $\lambda$ 4 wt and variants (1:3) was incubated  
672 with Huh7 cells for 24 hrs before infection with HCVcc Jc1 (MOI = 0.01  
673 TCID<sub>50</sub>/cell). HCVcc RNA was measured by RT-qPCR on total RNA isolated at  
674 72hpi. Results are shown relative to infection in cells treated with CM from  
675 EGFP-transfected cells. Error bars for HCVcc RNA show +/- SEM from 6  
676 replicates.

677 B) Effect of HsIFN $\lambda$ 4 wt and variants on entry of MLV pseudoparticles (pp) that lack  
678 HCV E1E2 (MLV core particles) in Huh7 cells. Following inoculation of Huh7  
679 cells stimulated with CM (1:3). Luciferase activity was measured at 72hpi. Error  
680 bars show +/- SEM from experiments performed in triplicate. \*\*\* = <0.001 by  
681 unpaired, two-tailed Student's T test.

682 C) The effect of HsIFN $\lambda$ 4 wt and variants on translation of a non-replicative JFH1  
683 HCV-SGR (GND) in Huh7 cells. Huh7 cells were treated with CM (1:3) for 24

- 684 hrs before transfection with *in vitro* transcribed JFH1 HCV-SGR (GND) RNA.  
685 RLU secreted into the media was measured at 4, 24, 48 and 72 hpt. Error bars  
686 show +/- SD from experiments performed in triplicate. Data are representative of  
687 two independent experiments.
- 688 D) Antiviral activity of HsIFN $\lambda$ 4 wt and variants on IAV (WSN strain) infection in  
689 A549 cells as determined by plaque assay of virus released from infected cells at  
690 48hpi. HsIFN $\lambda$ 4- and EGFP-containing CM (1:3) was incubated with A549 cells  
691 for 24 hrs before infection with IAV strain (MOI = 0.01 PFU/cell). Supernatant  
692 was harvested and titrated on MDCK cells. Error bars show +/- SEM in triplicate.  
693 \* = <0.05 by unpaired, two-tailed Student's T test.
- 694 E) Antiviral activity of HsIFN $\lambda$ 4 wt and variants on ZIKV (strain PE243) infection in  
695 A549 cells as determined by plaque assay of virus released from infected cells at  
696 72hpi. HsIFN $\lambda$ 4- and EGFP-containing CM (1:3) was incubated with A549 cells  
697 for 24 hrs before infection with ZIKV (MOI = 0.01). Supernatant was harvested at  
698 72hpi and infectivity was titrated on Vero cells. Error bars show +/- SEM in  
699 triplicate \* = <0.05 by unpaired, two-tailed Student's T test.
- 700 F) Number of significantly differentially-expressed genes in each experimental  
701 condition (sample 1) relative to each other condition (sample 2). Colour shaded by  
702 number of transcripts shared, as shown.
- 703 G) Heat map of all significantly differentially-expressed genes (log<sub>10</sub> Fragments Per  
704 Kilobase of transcript per Million mapped reads (FKPM) in each experimental  
705 condition including EGFP CM-stimulated cells.
- 706 H) Pathway analysis using IPA on all significantly differentially-expressed genes (>2  
707 fold). The top five most significantly induced pathways are shown [-log(p value)].

Bamford et al. IFNL4

708 I) Modelled structure of HsIFN $\lambda$ 4 showing position 79 or the homologous position  
709 with reference to receptor subunit-binding interfaces (IFN $\lambda$ R1 and IL10R2).  
710 Shown overlapping are the crystal structures for HsIFN $\lambda$ 1 (green) and HsIFN $\lambda$ 3  
711 (dark blue) overlaid together with a homology model (\*) of HsIFN $\lambda$ 4 (light blue).  
712

713 **REFERENCES**

- 714 Bassett, S. E., K. M. Brasky, and R. E. Lanford. 1998. Analysis of hepatitis C virus-  
715 inoculated chimpanzees reveals unexpected clinical profiles. *Journal of Virology*  
716 72:2589–2599.
- 717 Bigger, C. B., K. M. Brasky, and E. Robert. 2001. DNA microarray analysis of chimpanzee  
718 liver during acute resolving hepatitis c virus infection dna microarray analysis of  
719 chimpanzee liver during acute resolving hepatitis C virus infection. *Journal of Virology*  
720 75:7059–7065.
- 721 Blazek, K., H. L. Eames, M. Weiss, A. J. Byrne, D. Perocheau, J. E. Pease, S. Doyle, F.  
722 McCann, R. O. Williams, and I. A. Udalova. 2015. IFN- $\lambda$  resolves inflammation via  
723 suppression of neutrophil infiltration and IL-1 $\beta$  production. *The Journal of Experimental*  
724 *Medicine* 212:845–853.
- 725 Boldanova, T., A. Suslov, M. H. Heim, and A. Necsulea. 2017. Transcriptional response to  
726 hepatitis C virus infection and interferon-alpha treatment in the human liver. *EMBO*  
727 *Molecular Medicine* 9:816–834.
- 728 Bukh, J. 2004. A critical role for the chimpanzee model in the study of hepatitis C.  
729 *Hepatology* 39:1469–1475.
- 730 Cohen, T. S., and A. S. Prince. 2013. Bacterial Pathogens Activate a Common Inflammatory  
731 Pathway through IFN $\lambda$  Regulation of PDCD4. *PLoS Pathogens* 9:e1003682.
- 732 Cowton, V. M., A. G. N. Angus, S. J. Cole, C. K. Markopoulou, A. Owsianka, J. I. Dunlop,  
733 D. E. Gardner, T. Krey, and A. H. Patel. 2016. Role of conserved E2 residue W420 in  
734 receptor binding and hepatitis C virus infection. *Journal of Virology* 90:7456–7468.
- 735 Dill, M. T., Z. Makowska, F. H. T. Duong, F. Merkofer, M. Filipowicz, T. F. Baumert, L.  
736 Tornillo, L. Terracciano, and M. H. Heim. 2012. Interferon- $\gamma$ -stimulated genes, but not  
737 USP18, are expressed in livers of patients with acute hepatitis C. *Gastroenterology*



Bamford et al. IFNL4

- 738 143:777–786.e6.
- 739 Dixit, E., S. Boulant, Y. Zhang, A. S. Y. Lee, C. Odendall, B. Shum, N. Hacohen, Z. J. Chen,  
740 S. P. Whelan, M. Fransen, M. L. Nibert, G. Superti-Furga, and J. C. Kagan. 2010.  
741 Peroxisomes are signaling platforms for antiviral innate immunity. *Cell* 141:668–681.
- 742 Domingues, P., C. G. G. Bamford, C. Boutell, and J. McLauchlan. 2015. Inhibition of  
743 hepatitis C virus RNA replication by ISG15 does not require its conjugation to protein  
744 substrates by the HERC5 E3 ligase. *Journal of General Virology* 96: 3236-3242.
- 745 Donald, C. L., B. Brennan, S. L. Cumberworth, V. V. Rezelj, J. J. Clark, M. T. Cordeiro, R.  
746 Freitas de Oliveira França, L. J. Pena, G. S. Wilkie, A. Da Silva Filipe, C. Davis, J.  
747 Hughes, M. Varjak, M. Selinger, L. Zuvanov, A. M. Owsianka, A. H. Patel, J.  
748 McLauchlan, B. D. Lindenbach, G. Fall, A. A. Sall, R. Biek, J. Rehwinkel, E.  
749 Schnettler, and A. Kohl. 2016. Full genome sequence and sRNA interferon antagonist  
750 activity of Zika virus from Recife, Brazil. *PLoS Neglected Tropical Diseases*  
751 10:e0005048.
- 752 Eslam, M., A. M. Hashem, R. Leung, M. Romero-Gomez, T. Berg, G. J. Dore, H. L. K.  
753 Chan, W. L. Irving, D. Sheridan, M. L. Abate, L. A. Adams, A. Mangia, M. Weltman,  
754 E. Bugianesi, U. Spengler, O. Shaker, J. Fischer, L. Mollison, W. Cheng, E. Powell, J.  
755 Nattermann, S. Riordan, D. McLeod, N. J. Armstrong, M. W. Douglas, C. Liddle, D. R.  
756 Booth, J. George, G. Ahlenstiel, J. Ampuero, M. Bassendine, V. W. S. Wong, C. Rosso,  
757 R. White, L. Mezzabotta, V. Suppiah, M. Michalk, B. Malik, G. Matthews, T.  
758 Applegate, J. Grebely, V. Fragomeli, J. R. Jonsson, and R. Santaro. 2015. Interferon- $\lambda$   
759 rs12979860 genotype and liver fibrosis in viral and non-viral chronic liver disease.  
760 *Nature Communications* 6:6422.
- 761 Espinosa, V., O. Dutta, C. McElrath, P. Du, Y.-J. Chang, B. Cicciarelli, A. Pitler, I.  
762 Whitehead, J. J. Obar, J. E. Durbin, S. V. Kotenko, and A. Rivera. 2017. Type III

Bamford et al. IFNL4

- 763           interferon is a critical regulator of innate antifungal immunity. *Science Immunology*  
764           2:eaan5357.
- 765 Fan, W., S. Xie, X. Zhao, N. Li, C. Chang, L. Li, G. Yu, X. Chi, Y. Pan, J. Niu, J. Zhong, and  
766           B. Sun. 2016. IFN- $\lambda$ 4 desensitizes the response to IFN- $\alpha$  treatment in chronic hepatitis C  
767           through long-term induction of USP18. *Journal of General Virology* 97:2210–2220.
- 768 Foupouapouognigni, Y., S. A. Sadeuh Mba, E. B. a Betsem, D. Rousset, A. Froment, A.  
769           Gessain, and R. Njouom. 2011. Hepatitis B and C virus infections in the three Pygmy  
770           groups in Cameroon. *Journal of Clinical Microbiology* 49:737–740.
- 771 Gad, H. H., C. Dellgren, O. J. Hamming, S. Vends, S. R. Paludan, and R. Hartmann. 2009.  
772           Interferon- $\lambda$  is functionally an interferon but structurally related to the interleukin-10  
773           family. *Journal of Biological Chemistry* 284:20869–20875.
- 774 Galani, I. E., V. Triantafyllia, E.-E. Eleminiadou, O. Koltsida, A. Stavropoulos, M.  
775           Manioudaki, D. Thanos, S. E. Doyle, S. V. Kotenko, K. Thanopoulou, and E.  
776           Andreakos. 2017. Interferon- $\lambda$  mediates non-redundant front-line antiviral protection  
777           against influenza virus infection without compromising host fitness. *Immunity* 46:875–  
778           890.e6.
- 779 Ge, D., J. Fellay, A. J. Thompson, J. S. Simon, K. V. Shianna, T. J. Urban, E. L. Heinzen, P.  
780           Qiu, A. H. Bertelsen, A. J. Muir, M. Sulkowski, J. G. McHutchison, and D. B.  
781           Goldstein. 2009. Genetic variation in IL28B predicts hepatitis C treatment-induced viral  
782           clearance. *Nature* 461:399–401.
- 783 Hamming, O. J., E. Terczyńska-Dyla, G. Vieyres, R. Dijkman, S. E. Jørgensen, H. Akhtar, P.  
784           Siupka, T. Pietschmann, V. Thiel, and R. Hartmann. 2013. Interferon lambda 4 signals  
785           via the IFN $\lambda$  receptor to regulate antiviral activity against HCV and coronaviruses. *The*  
786           *EMBO Journal* 32:3055–3065.
- 787 Jones, D. M., P. Domingues, P. Targett-Adams, and J. McLauchlan. 2010. Comparison of

Bamford et al. IFNL4

- 788 U2OS and Huh-7 cells for identifying host factors that affect hepatitis C virus RNA  
789 replication. *Journal of General Virology* 91:2238–2248.
- 790 Key, F. M., B. Peter, M. Y. Dennis, E. Huerta-Sánchez, W. Tang, L. Prokunina-Olsson, R.  
791 Nielsen, and A. M. Andrés. 2014. Selection on a variant associated with improved viral  
792 clearance drives local, adaptive pseudogenization of interferon lambda 4 (IFNL4). *PLoS*  
793 *Genetics* 10:e1004681.
- 794 Lachance, J., B. Vernot, C. C. Elbers, B. Ferwerda, A. Froment, J.-M. Bodo, G. Lema, W.  
795 Fu, T. B. Nyambo, T. R. Rebbeck, K. Zhang, J. M. Akey, and S. A. Tishkoff. 2012.  
796 Evolutionary history and adaptation from high-coverage whole-genome sequences of  
797 diverse African hunter-gatherers. *Cell* 150:457–469.
- 798 Lanford, R. E., B. Guerra, C. B. Bigger, H. Lee, D. Chavez, and K. M. Brasky. 2007. Lack of  
799 response to exogenous interferon- $\alpha$  in the liver of chimpanzees chronically infected with  
800 hepatitis C virus. *Hepatology* 46:999–1008.
- 801 Lazear, H. M., B. P. Daniels, A. K. Pinto, A. C. Huang, S. C. Vick, S. E. Doyle, M. Gale, R.  
802 S. Klein, and M. S. Diamond. 2015a. Interferon- $\lambda$  restricts West Nile virus  
803 neuroinvasion by tightening the blood-brain barrier. *Science Translational Medicine*  
804 7:284ra59-284ra59.
- 805 Lazear, H. M., T. J. Nice, and M. S. Diamond. 2015b. Interferon- $\lambda$ : immune functions at  
806 barrier surfaces and beyond. *Immunity* 43:15–28.
- 807 Lindenbach, B. D., M. J. Evans, A. J. Syder, B. Wölk, T. L. Tellinghuisen, C. C. Liu, T.  
808 Maruyama, R. O. Hynes, D. R. Burton, J. a McKeating, and C. M. Rice. 2005. Complete  
809 replication of hepatitis C virus in cell culture. *Science*. 309:623–626.
- 810 Mallick, S., H. Li, M. Lipson, I. Mathieson, M. Gymrek, F. Racimo, M. Zhao, N. Chennagiri,  
811 S. Nordenfelt, A. Tandon, P. Skoglund, I. Lazaridis, S. Sankararaman, Q. Fu, N.  
812 Rohland, G. Renaud, Y. Erlich, T. Willems, C. Gallo, J. P. Spence, Y. S. Song, G.

Bamford et al. IFNL4

- 813 Poletti, F. Balloux, G. van Driem, P. de Knijff, I. G. Romero, A. R. Jha, D. M. Behar, C.  
814 M. Bravi, C. Capelli, T. Hervig, A. Moreno-Estrada, O. L. Posukh, E. Balanovska, O.  
815 Balanovsky, S. Karachanak-Yankova, H. Sahakyan, D. Toncheva, L. Yepiskoposyan, C.  
816 Tyler-Smith, Y. Xue, M. S. Abdullah, A. Ruiz-Linares, C. M. Beall, A. Di Rienzo, C.  
817 Jeong, E. B. Starikovskaya, E. Metspalu, J. Parik, R. Villems, B. M. Henn, U.  
818 Hodoglugil, R. Mahley, A. Sajantila, G. Stamatoyannopoulos, J. T. S. Wee, R.  
819 Khusainova, E. Khusnutdinova, S. Litvinov, G. Ayodo, D. Comas, M. F. Hammer, T.  
820 Kivisild, W. Klitz, C. A. Winkler, D. Labuda, M. Bamshad, L. B. Jorde, S. A. Tishkoff,  
821 W. S. Watkins, M. Metspalu, S. Dryomov, R. Sukernik, L. Singh, K. Thangaraj, S.  
822 Pääbo, J. Kelso, N. Patterson, and D. Reich. 2016. The Simons Genome Diversity  
823 Project: 300 genomes from 142 diverse populations. *Nature* 538:201–206.
- 824 Manry, J., G. Laval, E. Patin, S. Fornarino, Y. Itan, M. Fumagalli, M. Sironi, M. Tichit, C.  
825 Bouchier, J.-L. Casanova, L. B. Barreiro, and L. Quintana-Murci. 2011. Evolutionary  
826 genetic dissection of human interferons. *The Journal of Experimental Medicine*  
827 208:2747–2759.
- 828 Mendoza, J. L., W. M. Schneider, H.-H. Hoffmann, K. Vercauteren, K. M. Jude, A. Xiong, I.  
829 Moraga, T. M. Horton, J. S. Glenn, Y. P. de Jong, C. M. Rice, and K. C. Garcia. 2017.  
830 The IFN- $\lambda$ -IFN- $\lambda$ R1-IL-10R $\beta$  complex reveals structural features underlying type III  
831 IFN functional plasticity. *Immunity* 46:379–392.
- 832 Miknis, Z. J., E. Magracheva, W. Li, A. Zdanov, S. V. Kotenko, and A. Wlodawer. 2010.  
833 Crystal structure of Human interferon- $\lambda$ 1 in complex with its high-affinity receptor  
834 interferon- $\lambda$ R1. *Journal of Molecular Biology* 404:650–664.
- 835 Mohamed, M., A. McLees, and R. M. Elliott. 2009. Viruses in the Anopheles A, Anopheles  
836 B, and Tete serogroups in the Orthobunyavirus genus (family Bunyaviridae) do not  
837 encode an NSs protein. *Journal of Virology* 83:7612–7618.

Bamford et al. IFNL4

- 838 Mulangu, S., M. Borchert, J. Paweska, A. Tshomba, A. Afounde, A. Kulidri, R. Swanepoel,  
839 J.-J. Muyembe-Tamfum, and P. Van der Stuyft. 2016. High prevalence of IgG  
840 antibodies to Ebola virus in the Efé pygmy population in the Watsa region, Democratic  
841 Republic of the Congo. *BMC Infectious Diseases* 16:263.
- 842 Nanda, S., M. B. Havert, G. M. Calderón, M. Thomson, C. Jacobson, D. Kastner, and T. J.  
843 Liang. 2008. Hepatic transcriptome analysis of hepatitis C virus infection in  
844 chimpanzees defines unique gene expression patterns associated with viral clearance.  
845 *PLoS ONE* 3:e3442.
- 846 Nice, T. J., M. T. Baldrige, B. T. McCune, J. M. Norman, H. M. Lazear, M. Artyomov, M.  
847 S. Diamond, and H. W. Virgin. 2015. Interferon- $\lambda$  cures persistent murine norovirus  
848 infection in the absence of adaptive immunity. *Science* 347:269–273.
- 849 Njouom, R., C. Pasquier, A. Ayouba, A. Gessain, A. Froment, J. Mfoupouendoun, R.  
850 Pouillot, M. Dubois, K. Sandres-Sauné, J. Thonnon, J. Izopet, and E. Nerrienet. 2003.  
851 High rate of hepatitis C virus infection and predominance of genotype 4 among elderly  
852 inhabitants of a remote village of the rain forest of South Cameroon. *Journal of Medical*  
853 *Virology* 71:219–225.
- 854 Odendall, C., A. A. Voak, and J. C. Kagan. 2017. Type III IFNs are commonly induced by  
855 bacteria-sensing TLRs and reinforce epithelial barriers during infection. *The Journal of*  
856 *Immunology*:ji1700250.
- 857 Park, H., E. Serti, O. Eke, Muchmore B, Prokunina-Olsson L, Capone S, Folgari A,  
858 Rehmann B. 2012. IL-29 is the dominant type III interferon produced by hepatocytes  
859 during acute hepatitis C virus infection. *Hepatology*. 56:2060–2070.
- 860 Pietschmann, T., A. Kaul, G. Koutsoudakis, A. Shavinskaya, S. Kallis, E. Steinmann, K.  
861 Abid, F. Negro, M. Dreux, F.-L. Cosset, and R. Bartenschlager. 2006. Construction and  
862 characterization of infectious intragenotypic and intergenotypic hepatitis C virus

Bamford et al. IFNL4

- 863 chimeras. *Proceedings of the National Academy of Sciences* 103:7408–7413.
- 864 Prokunina-Olsson, L., B. Muchmore, W. Tang, R. M. Pfeiffer, H. Park, H. Dickensheets, D.  
865 Hergott, P. Porter-Gill, A. Mumy, I. Kohaar, S. Chen, N. Brand, M. Tarway, L. Liu, F.  
866 Sheikh, J. Astemborski, H. L. Bonkovsky, B. R. Edlin, C. D. Howell, T. R. Morgan, D.  
867 L. Thomas, B. Rehermann, R. P. Donnelly, and T. R. O’Brien. 2013. A variant upstream  
868 of IFNL3 (IL28B) creating a new interferon gene IFNL4 is associated with impaired  
869 clearance of hepatitis C virus. *Nature Genetics* 45:164–171.
- 870 Ran, F. A., P. D. Hsu, J. Wright, V. Agarwala, D. A. Scott, and F. Zhang. 2013. Genome  
871 engineering using the CRISPR-Cas9 system. *Nature Protocols* 8:2281–2308.
- 872 Randall, R. E., and S. Goodbourn. 2008. Interferons and viruses: an interplay between  
873 induction, signalling, antiviral responses and virus countermeasures. *Journal of General*  
874 *Virology* 89:1–47.
- 875 Ray, S. C., Q. Mao, R. E. Lanford, S. Bassett, O. Laeyendecker, Y. M. Wang, and D. L.  
876 Thomas. 2000. Hypervariable region 1 sequence stability during hepatitis C virus  
877 replication in chimpanzees. *Journal of Virology* 74:3058–66.
- 878 Schoggins, J. W. 2014. Interferon-stimulated genes: roles in viral pathogenesis. *Current*  
879 *Opinion in Virology* 6C:40–46.
- 880 Schoggins, J. W., S. J. Wilson, M. Panis, M. Y. Murphy, C. T. Jones, P. Bieniasz, and C. M.  
881 Rice. 2011. A diverse range of gene products are effectors of the type I interferon  
882 antiviral response. *Nature* 472:481–485.
- 883 Sheahan, T., N. Imanaka, S. Marukian, M. Dorner, P. Liu, A. Ploss, and C. M. Rice. 2014.  
884 Interferon lambda alleles predict innate antiviral immune responses and hepatitis C virus  
885 permissiveness. *Cell Host & Microbe* 15:190–202.
- 886 Su, A. I., J. P. Pezacki, L. Wodicka, A. D. Brideau, L. Supekova, R. Thimme, S. Wieland, J.  
887 Bukh, R. H. Purcell, P. G. Schultz, and F. V. Chisari. 2002. Genomic analysis of the

Bamford et al. IFNL4

- 888 host response to hepatitis C virus infection. *Proceedings of the National Academy of*  
889 *Sciences* 99:15669–15674.
- 890 Terczyńska-Dyla, E., S. Bibert, F. H. T. Duong, I. Krol, S. Jørgensen, E. Collinet, Z. Kutalik,  
891 V. Aubert, A. Cerny, L. Kaiser, R. Malinverni, A. Mangia, D. Moradpour, B. Müllhaupt,  
892 F. Negro, R. Santoro, D. Semela, N. Semmo, L. Rubbia-Brandt, G. Martinetti, M.  
893 Gorgievski, J.-F. Dufour, H. Hirsch, B. Helbling, S. Regenass, G. Dollenmaier, G.  
894 Cathomas, M. H. Heim, P.-Y. Bochud, and R. Hartmann. 2014. Reduced IFN $\lambda$ 4 activity  
895 is associated with improved HCV clearance and reduced expression of interferon-  
896 stimulated genes. *Nature Communications* 5:5699.
- 897 Thimme, R., J. Bukh, H. C. Spangenberg, S. Wieland, J. Pemberton, C. Steiger, S.  
898 Govindarajan, R. H. Purcell, and F. V. Chisari. 2002. Viral and immunological  
899 determinants of hepatitis C virus clearance, persistence, and disease. *Proceedings of the*  
900 *National Academy of Sciences* 99:15661–15668.
- 901 Thomas, E., V. D. Gonzalez, Q. Li, A. A. Modi, W. Chen, M. Noureddin, Y. Rotman, and T.  
902 J. Liang. 2012. HCV infection induces a unique hepatic innate immune response  
903 associated with robust production of type III interferons. *Gastroenterology* 142:978–988.
- 904 Trapnell, C., A. Roberts, L. Goff, G. Pertea, D. Kim, D. R. Kelley, H. Pimentel, S. L.  
905 Salzberg, J. L. Rinn, and L. Pachter. 2012. Differential gene and transcript expression  
906 analysis of RNA-seq experiments with TopHat and Cufflinks. *Nature Protocols* 7:562–  
907 578.
- 908 Walker, C. M. 1997. Comparative features of hepatitis C virus infection in humans and  
909 chimpanzees. *Springer Seminars in Immunopathology* 19:85–98.
- 910 Yu, C., D. Boon, S. L. McDonald, T. G. Myers, K. Tomioka, H. Nguyen, R. E. Engle, S.  
911 Govindarajan, S. U. Emerson, and R. H. Purcell. 2010. Pathogenesis of hepatitis E Virus  
912 and hepatitis C virus in chimpanzees: similarities and differences. *Journal of Virology*

Bamford et al. IFNL4

913 84:11264–11278.



**FIGURE 1**

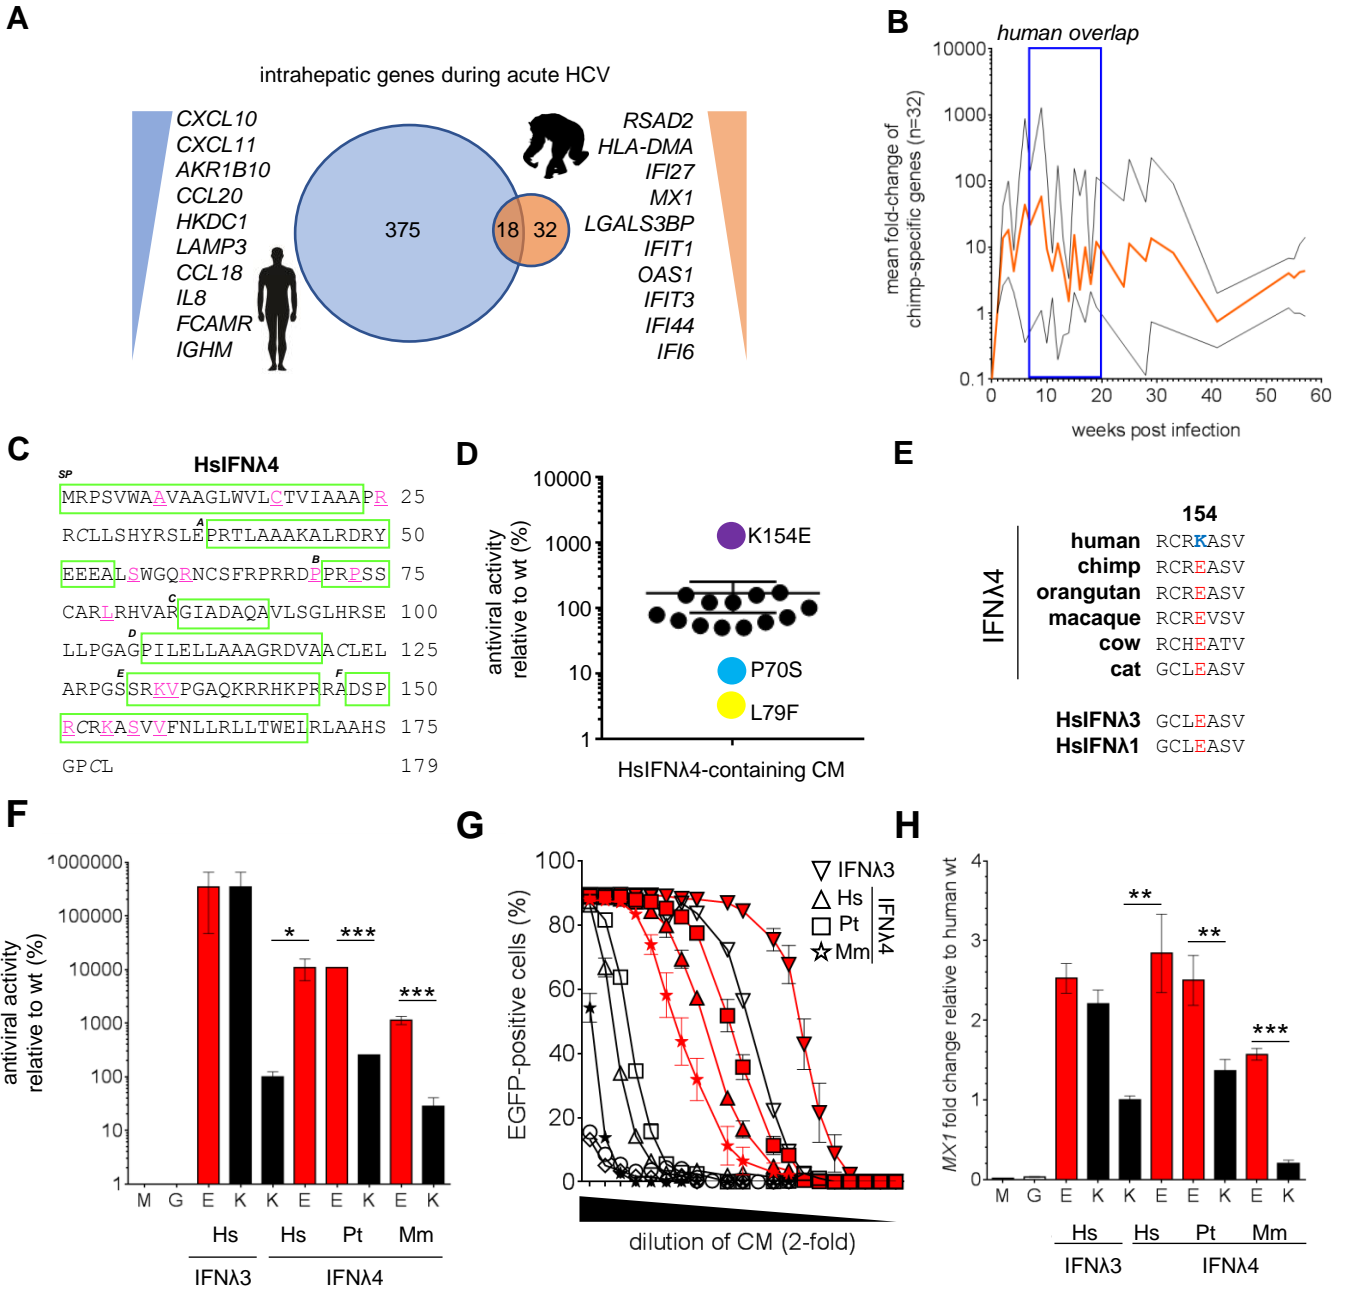

**FIGURE 2**

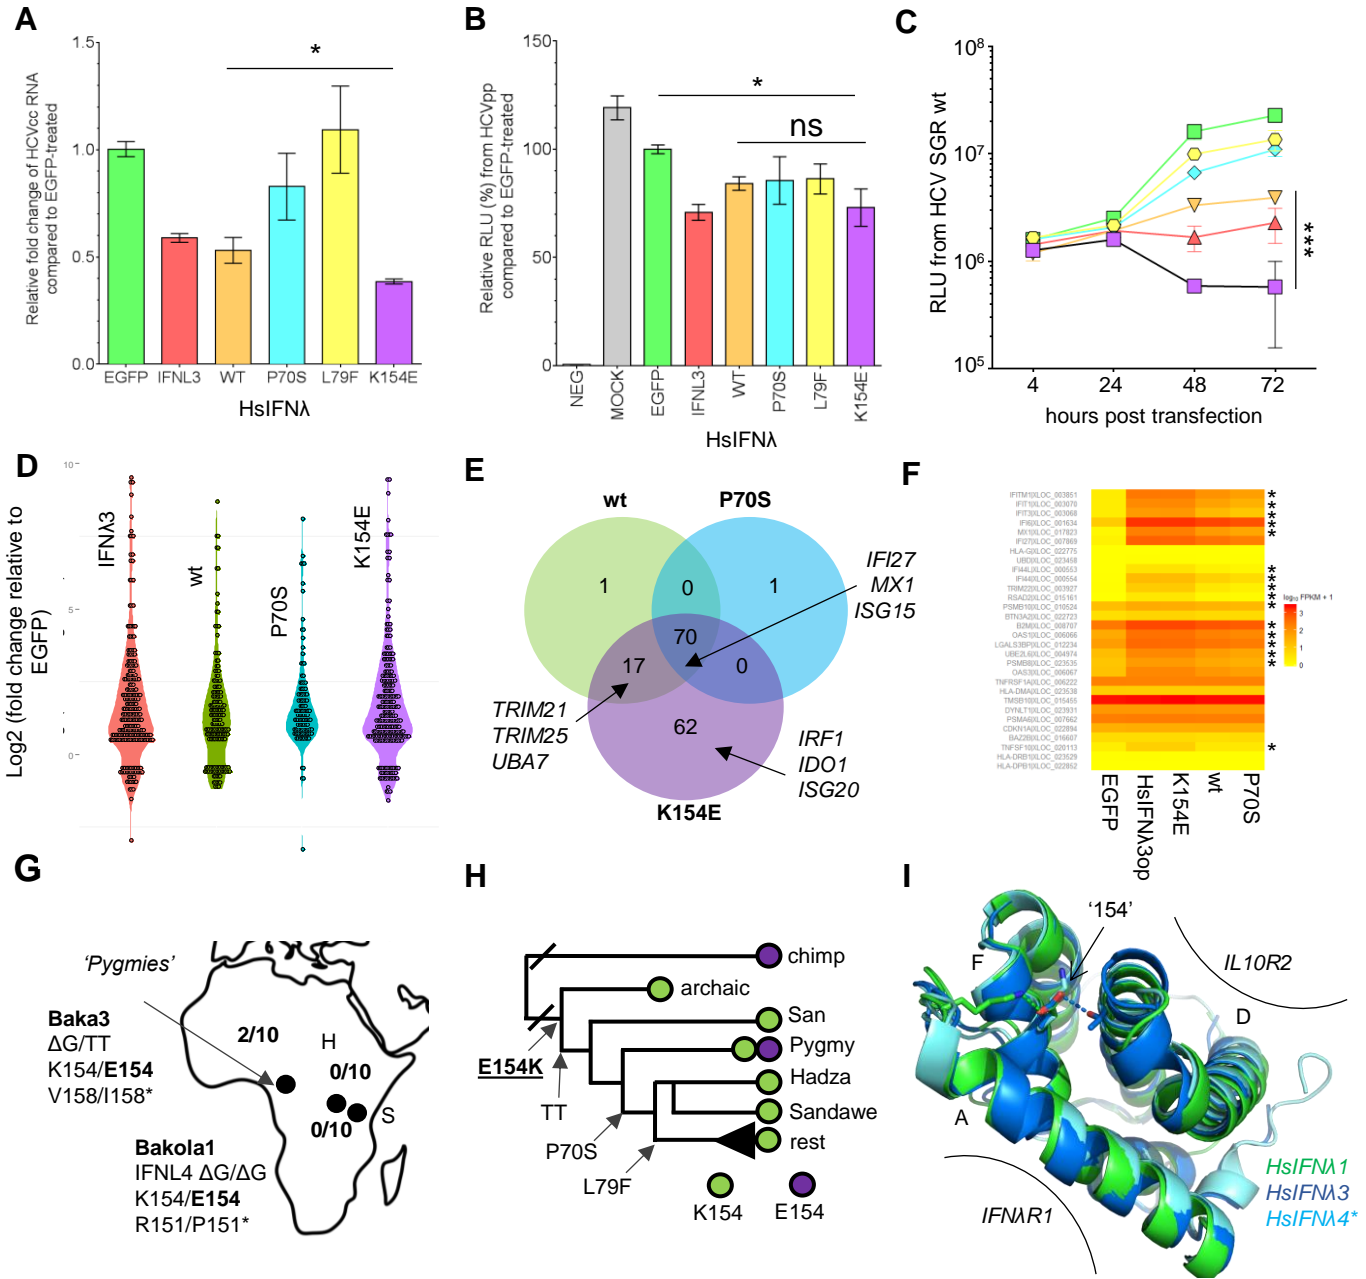

**FIGURE S1**

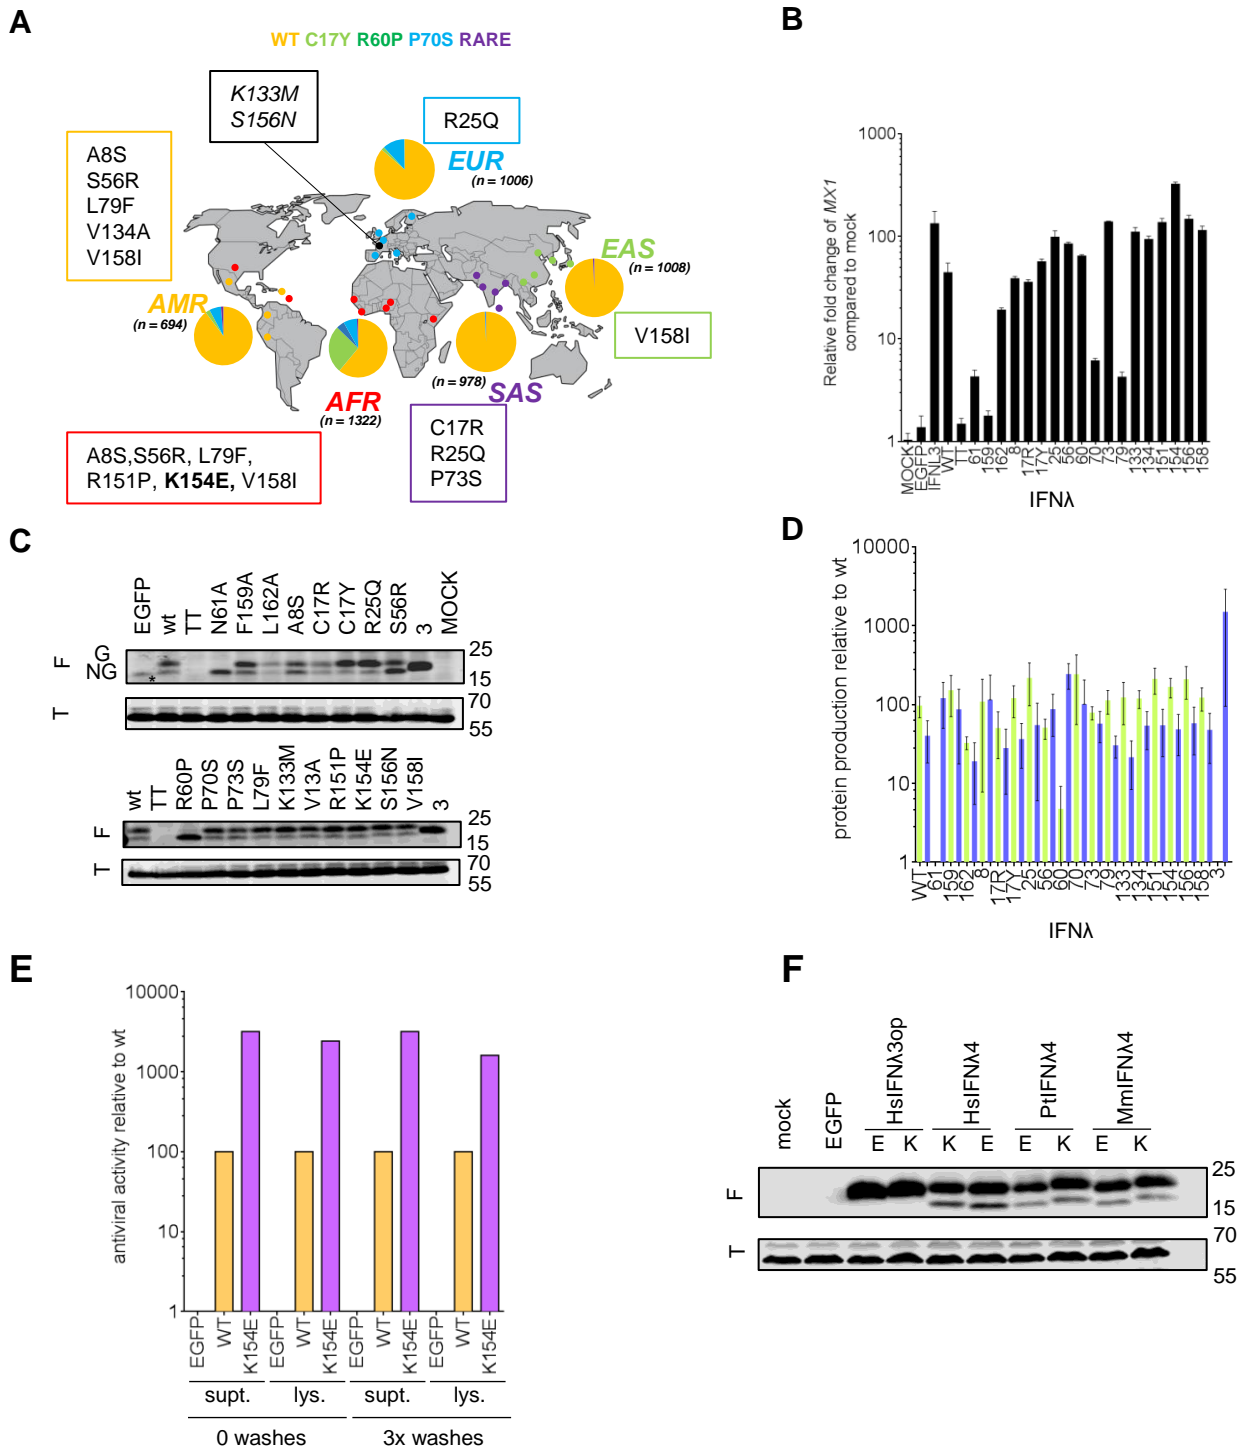

**FIGURE S2**

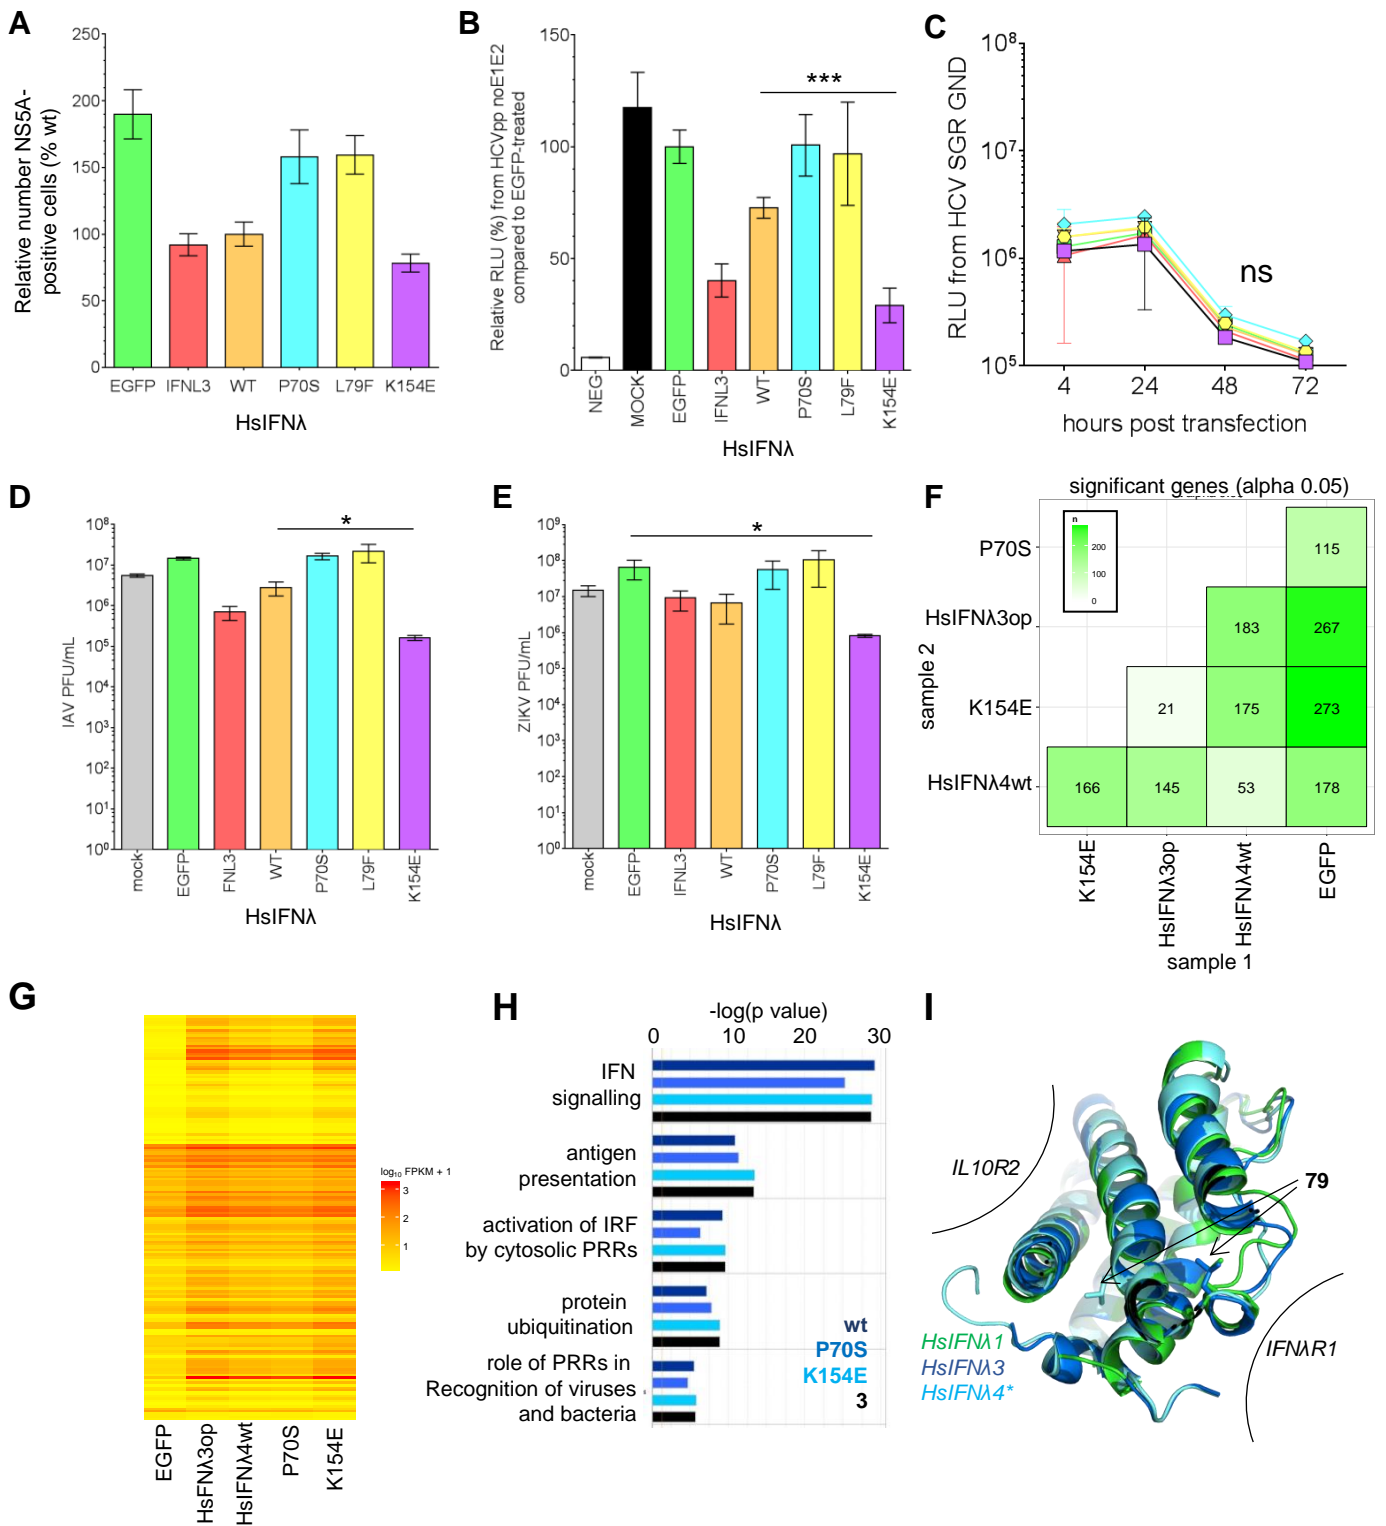

Source: http://biorxiv.org/content/10.1101/214825v1.full.pdf
